# Supplementary material for: Genomic Evidence of a Sars-Cov-2 Reinfection Case With E484K Spike Mutation in Brazil
Source: Preprints.org preprint supplement (doi:10.20944/preprints202101.0132.v1), 2021-01-06
Supplement: Supplementary file 3 [file supplementary]

## Sheet: Sheet1
Supplementary Table 1. Full details of the complete and near-complete SARS-CoV-2 reference genome sequences sampled in Brazil used in this study.
Virus name	Accession ID	Collection date	Location	Host	Sequencing technology	Lineage	Clade
hCoV-19/Brazil/SP-03/2020	EPI_ISL_414014	2020-03-02	South America / Brazil / Sao Paulo	Human	Ion Torrent S5	B.1.1	GR
hCoV-19/Brazil/SP-04/2020	EPI_ISL_414017	2020-03-04	South America / Brazil / Sao Paulo	Human	Ion Torrent S5	B.1.1	GR
hCoV-19/Brazil/BA-312/2020	EPI_ISL_415105	2020-03-04	South America / Brazil / Bahia / Feira de Santana	Human	Nanopore MinION	B.1.1	GR
hCoV-19/Brazil/SP-07/2020	EPI_ISL_416028	2020-03-03	South America / Brazil / Sao Paulo / Sao Paulo	Human	Ion Torrent S5	B.1.1	GR
hCoV-19/Brazil/SP-08/2020	EPI_ISL_416029	2020-03-04	South America / Brazil / Sao Paulo / Sao Paulo	Human	Ion Torrent S5	B.1.1	GR
hCoV-19/Brazil/SP-12/2020	EPI_ISL_416034	2020-03-04	South America / Brazil / Sao Paulo / Sao Paulo	Human	Ion Torrent S5	B.1.1	GR
hCoV-19/Brazil/SP-13/2020	EPI_ISL_416035	2020-03-05	South America / Brazil / Sao Paulo / Sao Paulo	Human	Ion Torrent S5	B.1.1	GR
hCoV-19/Brazil/SP-14/2020	EPI_ISL_416036	2020-03-05	South America / Brazil / Sao Paulo / Sao Paulo	Human	Ion Torrent S5	B.1.1.248	GR
hCoV-19/Brazil/DF-0001/2020	EPI_ISL_426580	2020-03-13	South America / Brazil / Distrito Federal / Brasilia	Human	Nanopore MinION	B.1.1	GR
hCoV-19/Brazil/AL-837/2020	EPI_ISL_427292	2020-03-18	South America / Brazil / Alagoas / Maceio	Human	Illumina MiSeq	B.1.1.248	GR
hCoV-19/Brazil/BA-510/2020	EPI_ISL_427293	2020-03-06	South America / Brazil / Bahia / Feira de Santana	Human	Illumina MiSeq	B.1.1	GR
hCoV-19/Brazil/DF-615i/2020	EPI_ISL_427294	2020-03-13	South America / Brazil / Distrito Federal / Brasilia	Human	Illumina MiSeq	B.1.1.33	GR
hCoV-19/Brazil/DF-619i/2020	EPI_ISL_427295	2020-03-13	South America / Brazil / Distrito Federal / Brasilia	Human	Illumina MiSeq	B.1.1.33	GR
hCoV-19/Brazil/DF-861/2020	EPI_ISL_427296	2020-03-23	South America / Brazil / Distrito Federal / Brasilia	Human	Illumina MiSeq	B.1.1.33	GR
hCoV-19/Brazil/DF-862/2020	EPI_ISL_427297	2020-03-23	South America / Brazil / Distrito Federal / Brasilia	Human	Illumina MiSeq	B.1.1.33	GR
hCoV-19/Brazil/DF-891/2020	EPI_ISL_427298	2020-03-22	South America / Brazil / Distrito Federal / Brasilia	Human	Illumina MiSeq	B.1.1.33	GR
hCoV-19/Brazil/RJ-477/2020	EPI_ISL_427300	2020-03-11	South America / Brazil / Rio de Janeiro	Human	Illumina MiSeq	B.1.1	GR
hCoV-19/Brazil/RJ-477i/2020	EPI_ISL_427301	2020-03-11	South America / Brazil / Rio de Janeiro	Human	Illumina MiSeq	B.1.1	GR
hCoV-19/Brazil/RJ-763/2020	EPI_ISL_427302	2020-03-20	South America / Brazil / Rio de Janeiro	Human	Illumina MiSeq	B.1.1.33	GR
hCoV-19/Brazil/RJ-818/2020	EPI_ISL_427303	2020-03-25	South America / Brazil / Rio de Janeiro	Human	Illumina MiSeq	B.1.1.33	GR
hCoV-19/Brazil/RJ-872/2020	EPI_ISL_427304	2020-03-26	South America / Brazil / Rio de Janeiro	Human	Illumina MiSeq	B.1.1.33	GR
hCoV-19/Brazil/MG-CV8/2020	EPI_ISL_429671	2020-03-13	South America / Brazil / Minas Gerais	Human	Nanopore MinION	B.1.1	O
hCoV-19/Brazil/MG-CV16/2020	EPI_ISL_429676	2020-03-16	South America / Brazil / Minas Gerais	Human	Nanopore MinION	B.1.1	O
hCoV-19/Brazil/MG-CV32/2020	EPI_ISL_429688	2020-03-17	South America / Brazil / Minas Gerais	Human	Nanopore MinION	B.1.1	GR
hCoV-19/Brazil/MG-CV33/2020	EPI_ISL_429689	2020-03-17	South America / Brazil / Minas Gerais	Human	Nanopore MinION	B.1.1	O
hCoV-19/Brazil/AP-IEC-161167/2020	EPI_ISL_450873	2020-03-17	South America / Brazil / Amapa	Human	Illumina NextSeq	B.1.1.33	GR
hCoV-19/Brazil/PA-IEC-161548/2020	EPI_ISL_450874	2020-03-20	South America / Brazil / Para	Human	Illumina NextSeq	B.1.1.33	GR
hCoV-19/Brazil/RJ-899/2020	EPI_ISL_456071	2020-03-30	South America / Brazil / Rio de Janeiro	Human	Nanopore MinION	B.1.1.33	GR
hCoV-19/Brazil/RJ-1056/2020	EPI_ISL_456072	2020-04-01	South America / Brazil / Rio de Janeiro	Human	Illumina MiSeq	B.1.1.33	GR
hCoV-19/Brazil/RJ-1058/2020	EPI_ISL_456073	2020-04-01	South America / Brazil / Rio de Janeiro	Human	Illumina MiSeq	B.1.1.33	GR
hCoV-19/Brazil/RJ-1065/2020	EPI_ISL_456074	2020-04-01	South America / Brazil / Rio de Janeiro	Human	Illumina MiSeq	B.1.1.33	GR
hCoV-19/Brazil/RJ-1100/2020	EPI_ISL_456075	2020-04-02	South America / Brazil / Rio de Janeiro / Belford Roxo	Human	Illumina MiSeq	B.1.1.33	GR
hCoV-19/Brazil/RJ-1111/2020	EPI_ISL_456076	2020-03-25	South America / Brazil / Rio de Janeiro	Human	Illumina MiSeq	B.1.1.33	GR
hCoV-19/Brazil/RJ-1119/2020	EPI_ISL_456077	2020-03-25	South America / Brazil / Rio de Janeiro	Human	Illumina MiSeq	B.1.1.33	GR
hCoV-19/Brazil/RJ-1402/2020	EPI_ISL_456079	2020-04-03	South America / Brazil / Rio de Janeiro	Human	Nanopore MinION	B.1.1.33	GR
hCoV-19/Brazil/RJ-1464/2020	EPI_ISL_456080	2020-04-06	South America / Brazil / Rio de Janeiro / Petropolis	Human	Nanopore MinION	B.1.1.33	GR
hCoV-19/Brazil/RJ-1466/2020	EPI_ISL_456081	2020-04-06	South America / Brazil / Rio de Janeiro	Human	Nanopore MinION	B.1.1.33	GR
hCoV-19/Brazil/RJ-1600/2020	EPI_ISL_456082	2020-04-02	South America / Brazil / Rio de Janeiro / Teresopolis	Human	Nanopore MinION	B.1.1.33	GR
hCoV-19/Brazil/RJ-1627/2020	EPI_ISL_456083	2020-04-03	South America / Brazil / Rio de Janeiro / Nova Iguacu	Human	Nanopore MinION	B.1.1.314	GR
hCoV-19/Brazil/RJ-1690/2020	EPI_ISL_456084	2020-04-08	South America / Brazil / Rio de Janeiro	Human	Nanopore MinION	B.1.1.33	GR
hCoV-19/Brazil/RJ-1691/2020	EPI_ISL_456085	2020-04-08	South America / Brazil / Rio de Janeiro	Human	Nanopore MinION	B.1.1.33	GR
hCoV-19/Brazil/RJ-1701/2020	EPI_ISL_456086	2020-04-08	South America / Brazil / Rio de Janeiro	Human	Nanopore MinION	B.1.1.33	GR
hCoV-19/Brazil/RJ-1702/2020	EPI_ISL_456087	2020-04-08	South America / Brazil / Rio de Janeiro	Human	Nanopore MinION	B.1.1.33	GR
hCoV-19/Brazil/RJ-1719/2020	EPI_ISL_456088	2020-04-06	South America / Brazil / Rio de Janeiro / Itaborai	Human	Nanopore MinION	B.1.1.248	GR
hCoV-19/Brazil/RJ-1901/2020	EPI_ISL_456089	2020-04-09	South America / Brazil / Rio de Janeiro	Human	Nanopore MinION	B.1.1.33	GR
hCoV-19/Brazil/RJ-1902/2020	EPI_ISL_456090	2020-04-09	South America / Brazil / Rio de Janeiro	Human	Nanopore MinION	B.1.1.33	GR
hCoV-19/Brazil/RJ-1921/2020	EPI_ISL_456091	2020-04-09	South America / Brazil / Rio de Janeiro	Human	Nanopore MinION	B.1.1.33	GR
hCoV-19/Brazil/RJ-1923/2020	EPI_ISL_456092	2020-04-10	South America / Brazil / Rio de Janeiro	Human	Nanopore MinION	B.1.1.33	GR
hCoV-19/Brazil/RJ-1927/2020	EPI_ISL_456093	2020-04-12	South America / Brazil / Rio de Janeiro	Human	Nanopore MinION	B.1.1.33	GR
hCoV-19/Brazil/RJ-1943/2020	EPI_ISL_456094	2020-04-13	South America / Brazil / Rio de Janeiro	Human	Nanopore MinION	B.1.1.33	GR
hCoV-19/Brazil/RJ-1948/2020	EPI_ISL_456095	2020-04-13	South America / Brazil / Rio de Janeiro	Human	Nanopore MinION	B.1.1.33	GR
hCoV-19/Brazil/RJ-1952/2020	EPI_ISL_456096	2020-04-13	South America / Brazil / Rio de Janeiro	Human	Nanopore MinION	B.1.1.33	GR
hCoV-19/Brazil/RJ-1966/2020	EPI_ISL_456097	2020-04-13	South America / Brazil / Rio de Janeiro	Human	Nanopore MinION	B.1.1.33	GR
hCoV-19/Brazil/RJ-2000/2020	EPI_ISL_456098	2020-04-13	South America / Brazil / Rio de Janeiro	Human	Nanopore MinION	B.1.1.33	GR
hCoV-19/Brazil/RJ-2007/2020	EPI_ISL_456099	2020-04-13	South America / Brazil / Rio de Janeiro	Human	Nanopore MinION	B.1.1.33	GR
hCoV-19/Brazil/RJ-2033/2020	EPI_ISL_456100	2020-04-15	South America / Brazil / Rio de Janeiro	Human	Nanopore MinION	B.1.1.33	GR
hCoV-19/Brazil/RJ-2044/2020	EPI_ISL_456101	2020-04-15	South America / Brazil / Rio de Janeiro / Duque de Caxias	Human	Nanopore MinION	B.1.1.33	GR
hCoV-19/Brazil/RJ-2057/2020	EPI_ISL_456102	2020-04-16	South America / Brazil / Rio de Janeiro	Human	Nanopore MinION	B.1.1.33	GR
hCoV-19/Brazil/RJ-2062/2020	EPI_ISL_456103	2020-04-16	South America / Brazil / Rio de Janeiro	Human	Nanopore MinION	B.1.1.33	GR
hCoV-19/Brazil/RJ-2072/2020	EPI_ISL_456104	2020-04-16	South America / Brazil / Rio de Janeiro	Human	Nanopore MinION	B.1.1.33	GR
hCoV-19/Brazil/RJ-2077/2020	EPI_ISL_456105	2020-04-16	South America / Brazil / Rio de Janeiro	Human	Nanopore MinION	B.1.1.33	GR
hCoV-19/Brazil/RJ-2078/2020	EPI_ISL_456106	2020-04-16	South America / Brazil / Rio de Janeiro	Human	Nanopore MinION	B.1.1.33	GR
hCoV-19/Brazil/AP-IEC-162741/2020	EPI_ISL_458138	2020-04-03	South America / Brazil / Amapa	Human	Illumina NextSeq	B.1.1.33	GR
hCoV-19/Brazil/AC-IEC-162535/2020	EPI_ISL_458139	2020-03-18	South America / Brazil / Acre	Human	Illumina NextSeq	B.1.1.33	GR
hCoV-19/Brazil/PA-IEC-162802/2020	EPI_ISL_458140	2020-04-07	South America / Brazil / Para	Human	Illumina NextSeq	B.1.1.248	GR
hCoV-19/Brazil/PA-IEC-164239/2020	EPI_ISL_458141	2020-04-26	South America / Brazil / Para	Human	Illumina NextSeq	B.1.1.248	GR
hCoV-19/Brazil/AP-IEC-162966/2020	EPI_ISL_458142	2020-04-05	South America / Brazil / Amapa	Human	Illumina NextSeq	B.1.1.314	GR
hCoV-19/Brazil/AP-IEC-164082/2020	EPI_ISL_458143	2020-04-15	South America / Brazil / Amapa	Human	Illumina NextSeq	B.1.1.33	GR
hCoV-19/Brazil/AP-IEC-163972/2020	EPI_ISL_458144	2020-04-15	South America / Brazil / Amapa	Human	Illumina NextSeq	B.1.1.33	GR
hCoV-19/Brazil/AP-IEC-164346/2020	EPI_ISL_458145	2020-04-20	South America / Brazil / Amapa	Human	Illumina NextSeq	B.1.1.33	GR
hCoV-19/Brazil/PA-IEC-164173/2020	EPI_ISL_458146	2020-04-23	South America / Brazil / Para	Human	Illumina NextSeq	B.1.1.28	GR
hCoV-19/Brazil/PA-IEC-164218/2020	EPI_ISL_458147	2020-04-24	South America / Brazil / Para	Human	Illumina NextSeq	B.1.1.248	GR
hCoV-19/Brazil/PA-IEC-164684/2020	EPI_ISL_458148	2020-04-27	South America / Brazil / Para	Human	Illumina NextSeq	B.1.1.33	GR
hCoV-19/Brazil/MA-IEC-163069/2020	EPI_ISL_458149	2020-04-06	South America / Brazil / Maranhao	Human	Illumina NextSeq	B.1.1.33	GR
hCoV-19/Brazil/RJ-1574/2020	EPI_ISL_467345	2020-04-02	South America / Brazil / Rio de Janeiro	Human	Illumina MiSeq	B.1.1.33	GR
hCoV-19/Brazil/RJ-2091/2020	EPI_ISL_467347	2020-04-16	South America / Brazil / Rio de Janeiro	Human	Illumina MiSeq	B.1.1.33	GR
hCoV-19/Brazil/RJ-2195/2020	EPI_ISL_467348	2020-04-17	South America / Brazil / Rio de Janeiro	Human	Illumina MiSeq	B.1.1.33	GR
hCoV-19/Brazil/RJ-2197/2020	EPI_ISL_467349	2020-04-17	South America / Brazil / Rio de Janeiro	Human	Illumina MiSeq	B.1.1.33	GR
hCoV-19/Brazil/RJ-2208/2020	EPI_ISL_467350	2020-04-17	South America / Brazil / Rio de Janeiro	Human	Illumina MiSeq	B.1.1.33	GR
hCoV-19/Brazil/RJ-2233/2020	EPI_ISL_467351	2020-04-17	South America / Brazil / Rio de Janeiro	Human	Illumina MiSeq	B.1.1.33	GR
hCoV-19/Brazil/RJ-2422/2020	EPI_ISL_467352	2020-04-20	South America / Brazil / Rio de Janeiro / Queimados	Human	Illumina MiSeq	B.1.1.33	GR
hCoV-19/Brazil/RJ-2669/2020	EPI_ISL_467353	2020-04-24	South America / Brazil / Rio de Janeiro / Niteroi	Human	Illumina MiSeq	B.1.1.33	GR
hCoV-19/Brazil/RJ-2678/2020	EPI_ISL_467355	2020-04-24	South America / Brazil / Rio de Janeiro	Human	Illumina MiSeq	B.1.1.33	GR
hCoV-19/Brazil/RJ-2682/2020	EPI_ISL_467356	2020-04-24	South America / Brazil / Rio de Janeiro	Human	Illumina MiSeq	B.1.1.248	GR
hCoV-19/Brazil/RJ-2683/2020	EPI_ISL_467357	2020-04-24	South America / Brazil / Rio de Janeiro	Human	Illumina MiSeq	B.1.1.33	GR
hCoV-19/Brazil/RJ-2696/2020	EPI_ISL_467358	2020-04-24	South America / Brazil / Rio de Janeiro	Human	Illumina MiSeq	B.1.1.33	GR
hCoV-19/Brazil/RJ-2717/2020	EPI_ISL_467359	2020-04-24	South America / Brazil / Rio de Janeiro	Human	Illumina MiSeq	B.1.1.248	GR
hCoV-19/Brazil/RJ-2733/2020	EPI_ISL_467360	2020-04-25	South America / Brazil / Rio de Janeiro / Duque de Caxias	Human	Illumina MiSeq	B.1.1.33	GR
hCoV-19/Brazil/RJ-2769/2020	EPI_ISL_467361	2020-04-27	South America / Brazil / Rio de Janeiro	Human	Illumina MiSeq	B.1.1.33	GR
hCoV-19/Brazil/RJ-2770/2020	EPI_ISL_467362	2020-04-27	South America / Brazil / Rio de Janeiro	Human	Illumina MiSeq	B.1.1.33	GR
hCoV-19/Brazil/RJ-2776/2020	EPI_ISL_467363	2020-04-27	South America / Brazil / Rio de Janeiro	Human	Illumina MiSeq	B.1.1.33	GR
hCoV-19/Brazil/RJ-2777/2020	EPI_ISL_467364	2020-04-25	South America / Brazil / Rio de Janeiro / Nova Iguacu	Human	Illumina MiSeq	B.1.1.33	GR
hCoV-19/Brazil/RJ-2811/2020	EPI_ISL_467365	2020-04-27	South America / Brazil / Rio de Janeiro	Human	Illumina MiSeq	B.1.1.33	GR
hCoV-19/Brazil/RJ-2812/2020	EPI_ISL_467366	2020-04-27	South America / Brazil / Rio de Janeiro	Human	Illumina MiSeq	B.1.1.248	GR
hCoV-19/Brazil/RJ-2822/2020	EPI_ISL_467367	2020-04-27	South America / Brazil / Rio de Janeiro / Niteroi	Human	Illumina MiSeq	B.1.1.33	GR
hCoV-19/Brazil/RJ-2840/2020	EPI_ISL_467368	2020-04-28	South America / Brazil / Rio de Janeiro	Human	Illumina MiSeq	B.1.1.33	GR
hCoV-19/Brazil/RJ-2844/2020	EPI_ISL_467369	2020-04-28	South America / Brazil / Rio de Janeiro	Human	Illumina MiSeq	B.1.1.33	GR
hCoV-19/Brazil/RJ-2847/2020	EPI_ISL_467370	2020-04-28	South America / Brazil / Rio de Janeiro	Human	Illumina MiSeq	B.1.1.33	GR
hCoV-19/Brazil/RJ-2868/2020	EPI_ISL_467371	2020-04-28	South America / Brazil / Rio de Janeiro	Human	Illumina MiSeq	B.1.1.33	GR
hCoV-19/Brazil/SP-138/2020	EPI_ISL_468305	2020-04-08	South America / Brazil / Sao Paulo / Diadema	Human	Ion Torrent S5	B.1.1	GR
hCoV-19/Brazil/SP-140/2020	EPI_ISL_468307	2020-04-08	South America / Brazil / Sao Paulo / Diadema	Human	Ion Torrent S5	B.1.1.143	GR
hCoV-19/Brazil/SP-141/2020	EPI_ISL_468308	2020-03-23	South America / Brazil / Sao Paulo / Sao Paulo	Human	Ion Torrent S5	B.1.1.143	GR
hCoV-19/Brazil/SP-144/2020	EPI_ISL_468310	2020-03-22	South America / Brazil / Sao Paulo / Sao Paulo	Human	Ion Torrent S5	B.1.1.33	GR
hCoV-19/Brazil/SP-146/2020	EPI_ISL_468311	2020-03-26	South America / Brazil / Sao Paulo / Sao Paulo	Human	Ion Torrent S5	B.1.1.248	GR
hCoV-19/Brazil/SP-147/2020	EPI_ISL_468312	2020-03-26	South America / Brazil / Sao Paulo / Sao Paulo	Human	Ion Torrent S5	B.1.1.28	GR
hCoV-19/Brazil/SP-148/2020	EPI_ISL_468313	2020-03-23	South America / Brazil / Sao Paulo / Sao Bernardo do Campo	Human	Ion Torrent S5	B.1.1.28	GR
hCoV-19/Brazil/SP-149/2020	EPI_ISL_468314	2020-03-26	South America / Brazil / Sao Paulo / Caieiras	Human	Ion Torrent S5	B.1.1.28	GR
hCoV-19/Brazil/SP-500/2020	EPI_ISL_468315	2020-04-12	South America / Brazil / Sao Paulo / Sao Paulo	Human	Ion Torrent S5	B.1.1.94	GR
hCoV-19/Brazil/SP-504/2020	EPI_ISL_468316	2020-04-14	South America / Brazil / Sao Paulo / Maua	Human	Ion Torrent S5	B.1.1.248	GR
hCoV-19/Brazil/SP-505/2020	EPI_ISL_468318	2020-04-15	South America / Brazil / Sao Paulo / Sao Paulo	Human	Ion Torrent S5	B.1.1.248	GR
hCoV-19/Brazil/SP-506/2020	EPI_ISL_468319	2020-04-14	South America / Brazil / Sao Paulo / Sao Bernardo do Campo	Human	Ion Torrent S5	B.1.1.143	GR
hCoV-19/Brazil/SP-508/2020	EPI_ISL_468320	2020-04-13	South America / Brazil / Sao Paulo / Hortolandia	Human	Ion Torrent S5	B.1.1.244	GR
hCoV-19/Brazil/SP-516/2020	EPI_ISL_468321	2020-04-22	South America / Brazil / Sao Paulo / Sao Paulo	Human	Ion Torrent S5	B.1.1.28	GR
hCoV-19/Brazil/SP-47/2020	EPI_ISL_471539	2020-03-19	South America / Brazil / Sao Paulo / Sao Paulo	Human	Ion Torrent S5	B.1.1.143	GR
hCoV-19/Brazil/SP-126/2020	EPI_ISL_471541	2020-04-02	South America / Brazil / Sao Paulo / Sao Paulo	Human	Ion Torrent S5	B.1.1.248	GR
hCoV-19/Brazil/SP-127/2020	EPI_ISL_471542	2020-04-03	South America / Brazil / Sao Paulo / Mogi das Cruzes	Human	Ion Torrent S5	B.1.1.28	GR
hCoV-19/Brazil/SP-131/2020	EPI_ISL_471543	2020-04-04	South America / Brazil / Sao Paulo / Presidente Venceslau	Human	Ion Torrent S5	B.1.19	G
hCoV-19/Brazil/SP-601/2020	EPI_ISL_471545	2020-03-22	South America / Brazil / Sao Paulo / Sao Paulo	Human	Ion Torrent S5	B.1.1.28	GR
hCoV-19/Brazil/SP-537/2020	EPI_ISL_471546	2020-03-20	South America / Brazil / Sao Paulo / Sao Paulo	Human	Ion Torrent S5	B.1.1.28	GR
hCoV-19/Brazil/SP-606/2020	EPI_ISL_471548	2020-04-10	South America / Brazil / Sao Paulo / Sao Paulo	Human	Ion Torrent S5	B.1.1.143	GR
hCoV-19/Brazil/SP-607/2020	EPI_ISL_471549	2020-04-13	South America / Brazil / Sao Paulo / Sao Paulo	Human	Ion Torrent S5	B.1.1.248	GR
hCoV-19/Brazil/SP-545/2020	EPI_ISL_471551	2020-04-10	South America / Brazil / Sao Paulo / Sao Paulo	Human	Ion Torrent S5	B.1.1.33	GR
hCoV-19/Brazil/SP-549/2020	EPI_ISL_471552	2020-04-01	South America / Brazil / Sao Paulo / Sao Paulo	Human	Ion Torrent S5	B.1.1.28	GR
hCoV-19/Brazil/SP-551/2020	EPI_ISL_471554	2020-03-29	South America / Brazil / Sao Paulo / Sao Paulo	Human	Ion Torrent S5	B.1.1.33	GR
hCoV-19/Brazil/SP-512/2020	EPI_ISL_471556	2020-04-18	South America / Brazil / Sao Paulo / Osasco	Human	Ion Torrent S5	B.1.1	GR
hCoV-19/Brazil/SP-523/2020	EPI_ISL_471562	2020-04-29	South America / Brazil / Sao Paulo / Sao Paulo	Human	Ion Torrent S5	B.1.1.248	GR
hCoV-19/Brazil/SP-524/2020	EPI_ISL_471581	2020-04-29	South America / Brazil / Sao Paulo / Sao Paulo	Human	Ion Torrent S5	B.1.1.94	GR
hCoV-19/Brazil/SP-525/2020	EPI_ISL_471582	2020-04-29	South America / Brazil / Sao Paulo / Sao Paulo	Human	Ion Torrent S5	B.1.1.28	GR
hCoV-19/Brazil/SP-526/2020	EPI_ISL_471647	2020-04-30	South America / Brazil / Sao Paulo / Barueri	Human	Ion Torrent S5	B.1.1.248	GR
hCoV-19/Brazil/SP-527/2020	EPI_ISL_471648	2020-04-30	South America / Brazil / Sao Paulo / Itapecerica da Serra	Human	Ion Torrent S5	B.1.1.248	GR
hCoV-19/Brazil/SP-L12-CD28/2020	EPI_ISL_476221	2020-03-09	South America / Brazil / Sao Paulo	Human	Oxford Nanopore	B.1.1.33	GR
hCoV-19/Brazil/PR-L16-CD333/2020	EPI_ISL_476282	2020-03-28	South America / Brazil / Parana	Human	Oxford Nanopore	B.1.1.248	GR
hCoV-19/Brazil/SC-L17-CD322/2020	EPI_ISL_476297	2020-03-26	South America / Brazil / Santa Catarina	Human	Oxford Nanopore	B.1.1.33	GR
hCoV-19/Brazil/SP-L2-CAMPI53/2020	EPI_ISL_476341	2020-04-18	South America / Brazil / Sao Paulo	Human	Oxford Nanopore	B.1.1.28	GR
hCoV-19/Brazil/SP-L22-CD474/2020	EPI_ISL_476373	2020-04-01	South America / Brazil / Sao Paulo	Human	Oxford Nanopore	B.1.1.28	GR
hCoV-19/Brazil/SP-L4-CAMPI51/2020	EPI_ISL_476395	2020-04-18	South America / Brazil / Sao Paulo	Human	Oxford Nanopore	B.1.1.28	GR
hCoV-19/Brazil/SP-L4-CAMPI65/2020	EPI_ISL_476398	2020-04-18	South America / Brazil / Sao Paulo	Human	Oxford Nanopore	B.1.1.248	GR
hCoV-19/Brazil/SP-L7-CD67/2020	EPI_ISL_476435	2020-03-19	South America / Brazil / Sao Paulo	Human	Oxford Nanopore	B.1.1.33	GR
hCoV-19/Brazil/SP-L7-CD72/2020	EPI_ISL_476439	2020-03-24	South America / Brazil / Sao Paulo	Human	Oxford Nanopore	B.1.1.33	GR
hCoV-19/Brazil/SP-L7-CD79/2020	EPI_ISL_476445	2020-03-23	South America / Brazil / Sao Paulo	Human	Oxford Nanopore	B.1.1.248	GR
hCoV-19/Brazil/SP-L7-CD81/2020	EPI_ISL_476446	2020-03-24	South America / Brazil / Sao Paulo	Human	Oxford Nanopore	B.1.1.248	GR
hCoV-19/Brazil/SP-L9-CD118/2020	EPI_ISL_476469	2020-03-24	South America / Brazil / Sao Paulo	Human	Oxford Nanopore	B.1.1.248	GR
hCoV-19/Brazil/UN-HIAE-SP03/2020	EPI_ISL_486427	2020-03-13	South America / Brazil	Human	Illumina	B.1.1.33	GR
hCoV-19/Brazil/UN-HIAE-SP04/2020	EPI_ISL_486429	2020-03-20	South America / Brazil	Human	Illumina	B.1.1.28	GR
hCoV-19/Brazil/RJ-UFRJ-1019/2020	EPI_ISL_492032	2020-04-15	South America / Brazil / Rio de Janeiro / Rio de Janeiro	Human	Ion Torrent S5	B.1.1.33	GR
hCoV-19/Brazil/RJ-UFRJ-1640/2020	EPI_ISL_492033	2020-04-29	South America / Brazil / Rio de Janeiro / Rio de Janeiro	Human	Ion Torrent S5	B.1.1.33	GR
hCoV-19/Brazil/RJ-UFRJ-2215/2020	EPI_ISL_492034	2020-04-17	South America / Brazil / Rio de Janeiro / Rio de Janeiro	Human	Ion Torrent S5	B.1.1.33	GR
hCoV-19/Brazil/RJ-UFRJ-2517/2020	EPI_ISL_492035	2020-05-29	South America / Brazil / Rio de Janeiro / Rio de Janeiro	Human	Ion Torrent S5	B.1.1.33	GR
hCoV-19/Brazil/RJ-UFRJ-9331/2020	EPI_ISL_492036	2020-06-01	South America / Brazil / Rio de Janeiro / Resende	Human	Ion Torrent S5	B.1.1.248	GR
hCoV-19/Brazil/RJ-UFRJ-1784/2020	EPI_ISL_492037	2020-04-29	South America / Brazil / Rio de Janeiro / Niteroi	Human	Ion Torrent S5	B.1.1.33	GR
hCoV-19/Brazil/RJ-UFRJ-11785/2020	EPI_ISL_492038	2020-04-29	South America / Brazil / Rio de Janeiro / Niteroi	Human	Ion Torrent S5	B.1.1.33	GR
hCoV-19/Brazil/RJ-UFRJ-11786/2020	EPI_ISL_492039	2020-04-29	South America / Brazil / Rio de Janeiro / Niteroi	Human	Ion Torrent S5	B.1.1.33	GR
hCoV-19/Brazil/RJ-UFRJ-32317/2020	EPI_ISL_492040	2020-04-30	South America / Brazil / Rio de Janeiro / Rio de Janeiro	Human	Ion Torrent S5	B.1.1.33	GR
hCoV-19/Brazil/RJ-UFRJ-32321/2020	EPI_ISL_492041	2020-04-30	South America / Brazil / Rio de Janeiro / Rio de Janeiro	Human	Ion Torrent S5	B.1.1.33	GR
hCoV-19/Brazil/RJ-UFRJ-54093/2020	EPI_ISL_492042	2020-04-16	South America / Brazil / Rio de Janeiro / Rio de Janeiro	Human	Ion Torrent S5	B.1.1.33	GR
hCoV-19/Brazil/RJ-UFRJ-57437/2020	EPI_ISL_492043	2020-05-25	South America / Brazil / Rio de Janeiro / Rio de Janeiro	Human	Ion Torrent S5	B.1.1.33	GR
hCoV-19/Brazil/RJ-UFRJ-57721/2020	EPI_ISL_492044	2020-05-27	South America / Brazil / Rio de Janeiro / Rio de Janeiro	Human	Ion Torrent S5	B.1.1.33	GR
hCoV-19/Brazil/RJ-UFRJ-57722/2020	EPI_ISL_492045	2020-05-27	South America / Brazil / Rio de Janeiro / Rio de Janeiro	Human	Ion Torrent S5	B.1.1.33	GR
hCoV-19/Brazil/RJ-UFRJ-58090/2020	EPI_ISL_492046	2020-05-29	South America / Brazil / Sao Paulo / Sao Paulo	Human	Ion Torrent S5	B.1.1.33	GR
hCoV-19/Brazil/RJ-UFRJ-58110/2020	EPI_ISL_492047	2020-05-29	South America / Brazil / Sao Paulo / Sao Paulo	Human	Ion Torrent S5	B.1.1.33	GR
hCoV-19/Brazil/RJ-UFRJ-58271/2020	EPI_ISL_492048	2020-06-01	South America / Brazil / Rio de Janeiro / Rio de Janeiro	Human	Ion Torrent S5	B.1.1.33	GR
hCoV-19/Brazil/PE-IAM08/2020	EPI_ISL_500460	2020-04-07	South America / Brazil / Pernambuco / Recife	Human	Illumina MiSeq	B.1.1.66	GR
hCoV-19/Brazil/PE-IAM10/2020	EPI_ISL_500461	2020-04-07	South America / Brazil / Pernambuco / Recife	Human	Illumina MiSeq	B.1.1	GR
hCoV-19/Brazil/PE-IAM103/2020	EPI_ISL_500462	2020-04-09	South America / Brazil / Pernambuco / Recife	Human	Illumina MiSeq	B.1.1	GR
hCoV-19/Brazil/PE-IAM215/2020	EPI_ISL_500471	2020-04-06	South America / Brazil / Pernambuco / Olinda	Human	Illumina MiSeq	B.1.1	GR
hCoV-19/Brazil/PE-IAM221/2020	EPI_ISL_500473	2020-04-08	South America / Brazil / Pernambuco / Recife	Human	Illumina MiSeq	B.1.1	GR
hCoV-19/Brazil/PE-IAM238/2020	EPI_ISL_500475	2020-04-09	South America / Brazil / Pernambuco / Recife	Human	Illumina MiSeq	B.1.1	GR
hCoV-19/Brazil/PE-IAM30/2020	EPI_ISL_500477	2020-04-08	South America / Brazil / Pernambuco / Ipojuca	Human	Illumina MiSeq	B.1.1	GR
hCoV-19/Brazil/PE-IAM311/2020	EPI_ISL_500480	2020-04-13	South America / Brazil / Pernambuco / Recife	Human	Illumina MiSeq	B.1.1	GR
hCoV-19/Brazil/PE-IAM39/2020	EPI_ISL_500481	2020-04-08	South America / Brazil / Pernambuco / Recife	Human	Illumina MiSeq	B.1.1	GR
hCoV-19/Brazil/PE-IAM48/2020	EPI_ISL_500482	2020-04-08	South America / Brazil / Pernambuco / Recife	Human	Illumina MiSeq	B.1.1	GR
hCoV-19/Brazil/PE-IAM67/2020	EPI_ISL_500483	2020-04-08	South America / Brazil / Pernambuco / Recife	Human	Illumina MiSeq	B.1.1.248	GR
hCoV-19/Brazil/PE-IAM84/2020	EPI_ISL_500484	2020-04-08	South America / Brazil / Pernambuco / Recife	Human	Illumina MiSeq	B.1.1	GR
hCoV-19/Brazil/PE-IAM87/2020	EPI_ISL_500485	2020-04-08	South America / Brazil / Pernambuco / Sao Lourenco da Mata	Human	Illumina MiSeq	B.1.1	GR
hCoV-19/Brazil/PE-IAM89/2020	EPI_ISL_500486	2020-04-07	South America / Brazil / Pernambuco / Camaragibe	Human	Illumina MiSeq	B.1.1	GR
hCoV-19/Brazil/PE-IAM29/2020	EPI_ISL_500872	2020-04-08	South America / Brazil / Pernambuco / Olinda	Human	Illumina MiSeq	B.1.1	GR
hCoV-19/Brazil/PE-COV0260/2020	EPI_ISL_502875	2020-06-24	South America / Brazil / Pernambuco / Recife	Human	Illumina MiSeq	B.1.1.248	G
hCoV-19/Brazil/PR-LRV-01/2020	EPI_ISL_510535	2020-05-08	South America / Brazil / Parana / Curitiba	Human	Illumina	B.1.1.33	GR
hCoV-19/Brazil/RJ-INCA-C06/2020	EPI_ISL_513513	2020-04-08	South America / Brazil / Rio de Janeiro	Human	Illumina Miseq / Sanger	B.1.1.33	GR
hCoV-19/Brazil/RJ-INCA-C07/2020	EPI_ISL_513514	2020-04-08	South America / Brazil / Rio de Janeiro	Human	Illumina Miseq / Sanger	B.1.1.28	GR
hCoV-19/Brazil/RJ-INCA-C12/2020	EPI_ISL_513515	2020-04-14	South America / Brazil / Rio de Janeiro	Human	Illumina Miseq / Sanger	B.1.1.33	GR
hCoV-19/Brazil/RJ-INCA-C15/2020	EPI_ISL_513518	2020-04-14	South America / Brazil / Rio de Janeiro	Human	Illumina Miseq / Sanger	B.1.1.33	GR
hCoV-19/Brazil/RJ-INCA-C181/2020	EPI_ISL_513519	2020-04-30	South America / Brazil / Rio de Janeiro	Human	Illumina Miseq / Sanger	B.1.1.33	GR
hCoV-19/Brazil/RJ-INCA-C182/2020	EPI_ISL_513520	2020-04-30	South America / Brazil / Rio de Janeiro	Human	Illumina Miseq / Sanger	B.1.1.33	GR
hCoV-19/Brazil/RJ-INCA-C183/2020	EPI_ISL_513521	2020-04-30	South America / Brazil / Rio de Janeiro	Human	Illumina Miseq / Sanger	B.1.1.33	GR
hCoV-19/Brazil/RJ-INCA-C187/2020	EPI_ISL_513522	2020-04-30	South America / Brazil / Rio de Janeiro	Human	Illumina Miseq / Sanger	B.1.1.33	GR
hCoV-19/Brazil/RJ-INCA-C190/2020	EPI_ISL_513524	2020-04-30	South America / Brazil / Rio de Janeiro	Human	Illumina Miseq / Sanger	B.1.1.33	GR
hCoV-19/Brazil/RJ-INCA-C194/2020	EPI_ISL_513525	2020-04-30	South America / Brazil / Rio de Janeiro	Human	Illumina Miseq / Sanger	B.1.1.33	GR
hCoV-19/Brazil/RJ-INCA-C197/2020	EPI_ISL_513526	2020-04-30	South America / Brazil / Rio de Janeiro	Human	Illumina Miseq / Sanger	B.1.1.33	GR
hCoV-19/Brazil/RJ-INCA-C199/2020	EPI_ISL_513527	2020-04-30	South America / Brazil / Rio de Janeiro	Human	Illumina Miseq / Sanger	B.1.1.314	GR
hCoV-19/Brazil/RJ-INCA-C22/2020	EPI_ISL_513530	2020-04-16	South America / Brazil / Rio de Janeiro	Human	Illumina Miseq / Sanger	B.1.1.33	GR
hCoV-19/Brazil/RJ-INCA-C23/2020	EPI_ISL_513531	2020-04-16	South America / Brazil / Rio de Janeiro	Human	Illumina Miseq / Sanger	B.1.1.33	GR
hCoV-19/Brazil/RJ-INCA-C24/2020	EPI_ISL_513532	2020-04-16	South America / Brazil / Rio de Janeiro	Human	Illumina Miseq / Sanger	B.1.1.28	GR
hCoV-19/Brazil/RJ-INCA-C25/2020	EPI_ISL_513533	2020-04-16	South America / Brazil / Rio de Janeiro	Human	Illumina Miseq / Sanger	B.1.1.33	GR
hCoV-19/Brazil/RJ-INCA-C26/2020	EPI_ISL_513534	2020-04-16	South America / Brazil / Rio de Janeiro	Human	Illumina Miseq / Sanger	B.1.1.33	GR
hCoV-19/Brazil/RJ-INCA-C27/2020	EPI_ISL_513535	2020-04-16	South America / Brazil / Rio de Janeiro	Human	Illumina Miseq / Sanger	B.1.1.33	GR
hCoV-19/Brazil/RJ-INCA-C28/2020	EPI_ISL_513536	2020-04-16	South America / Brazil / Rio de Janeiro	Human	Illumina Miseq / Sanger	B.1.1.33	GR
hCoV-19/Brazil/RJ-INCA-C29/2020	EPI_ISL_513537	2020-04-16	South America / Brazil / Rio de Janeiro	Human	Illumina Miseq / Sanger	B.1.1.33	GR
hCoV-19/Brazil/RJ-INCA-C30/2020	EPI_ISL_513538	2020-04-16	South America / Brazil / Rio de Janeiro	Human	Illumina Miseq / Sanger	B.1.1.33	GR
hCoV-19/Brazil/RJ-INCA-C31/2020	EPI_ISL_513539	2020-04-16	South America / Brazil / Rio de Janeiro	Human	Illumina Miseq / Sanger	B.1.1.33	GR
hCoV-19/Brazil/RJ-INCA-C32/2020	EPI_ISL_513540	2020-04-16	South America / Brazil / Rio de Janeiro	Human	Illumina Miseq / Sanger	B.1.1.33	GR
hCoV-19/Brazil/RJ-INCA-C33/2020	EPI_ISL_513541	2020-04-16	South America / Brazil / Rio de Janeiro	Human	Illumina Miseq / Sanger	B.1.1.33	GR
hCoV-19/Brazil/RJ-INCA-C34/2020	EPI_ISL_513542	2020-04-16	South America / Brazil / Rio de Janeiro	Human	Illumina Miseq / Sanger	B.1.1.33	GR
hCoV-19/Brazil/RJ-INCA-C35/2020	EPI_ISL_513543	2020-04-16	South America / Brazil / Rio de Janeiro	Human	Illumina Miseq / Sanger	B.1.1.33	GR
hCoV-19/Brazil/RJ-INCA-C36/2020	EPI_ISL_513544	2020-04-16	South America / Brazil / Rio de Janeiro	Human	Illumina Miseq / Sanger	B.1.1.33	GR
hCoV-19/Brazil/RJ-INCA-C37/2020	EPI_ISL_513545	2020-04-16	South America / Brazil / Rio de Janeiro	Human	Illumina Miseq / Sanger	B.1.1.33	GR
hCoV-19/Brazil/RJ-INCA-C38/2020	EPI_ISL_513546	2020-04-17	South America / Brazil / Rio de Janeiro	Human	Illumina Miseq / Sanger	B.1.1.248	GR
hCoV-19/Brazil/RJ-INCA-C39/2020	EPI_ISL_513547	2020-04-17	South America / Brazil / Rio de Janeiro	Human	Illumina Miseq / Sanger	B.1.1.33	GR
hCoV-19/Brazil/RJ-INCA-C40/2020	EPI_ISL_513548	2020-04-17	South America / Brazil / Rio de Janeiro	Human	Illumina Miseq / Sanger	B.1.1.33	GR
hCoV-19/Brazil/RJ-INCA-C41/2020	EPI_ISL_513549	2020-04-17	South America / Brazil / Rio de Janeiro	Human	Illumina Miseq / Sanger	B.1.1.33	GR
hCoV-19/Brazil/RJ-INCA-C42/2020	EPI_ISL_513550	2020-04-17	South America / Brazil / Rio de Janeiro	Human	Illumina Miseq / Sanger	B.1.1.33	GR
hCoV-19/Brazil/RJ-INCA-C44/2020	EPI_ISL_513551	2020-04-17	South America / Brazil / Rio de Janeiro	Human	Illumina Miseq / Sanger	B.1.1.33	GR
hCoV-19/Brazil/RJ-INCA-C47/2020	EPI_ISL_513553	2020-04-20	South America / Brazil / Rio de Janeiro	Human	Illumina Miseq / Sanger	B.1.1.33	GR
hCoV-19/Brazil/RJ-INCA-C63/2020	EPI_ISL_513556	2020-04-22	South America / Brazil / Rio de Janeiro	Human	Illumina Miseq / Sanger	B.1.1.33	GR
hCoV-19/Brazil/RJ-INCA-C64/2020	EPI_ISL_513557	2020-04-22	South America / Brazil / Rio de Janeiro	Human	Illumina Miseq / Sanger	B.1.1.28	GR
hCoV-19/Brazil/RJ-INCA-C65/2020	EPI_ISL_513558	2020-04-22	South America / Brazil / Rio de Janeiro	Human	Illumina Miseq / Sanger	B.1.1.33	GR
hCoV-19/Brazil/RJ-INCA-C67/2020	EPI_ISL_513559	2020-04-22	South America / Brazil / Rio de Janeiro	Human	Illumina Miseq / Sanger	B.1.1.33	GR
hCoV-19/Brazil/RJ-INCA-C68/2020	EPI_ISL_513560	2020-04-22	South America / Brazil / Rio de Janeiro	Human	Illumina Miseq / Sanger	B.1.1.33	GR
hCoV-19/Brazil/RJ-INCA-C69/2020	EPI_ISL_513561	2020-04-22	South America / Brazil / Rio de Janeiro	Human	Illumina Miseq / Sanger	B.1.1.33	GR
hCoV-19/Brazil/RJ-INCA-C70/2020	EPI_ISL_513562	2020-04-22	South America / Brazil / Rio de Janeiro	Human	Illumina Miseq / Sanger	B.1.1.33	GR
hCoV-19/Brazil/RJ-INCA-C72/2020	EPI_ISL_513563	2020-04-24	South America / Brazil / Rio de Janeiro	Human	Illumina Miseq / Sanger	B.1.1.33	GR
hCoV-19/Brazil/RJ-INCA-C73/2020	EPI_ISL_513564	2020-04-24	South America / Brazil / Rio de Janeiro	Human	Illumina Miseq / Sanger	B.1.1.33	GR
hCoV-19/Brazil/RJ-INCA-C77/2020	EPI_ISL_513567	2020-04-24	South America / Brazil / Rio de Janeiro	Human	Illumina Miseq / Sanger	B.1.1.33	GR
hCoV-19/Brazil/RJ-INCA-C78/2020	EPI_ISL_513568	2020-04-24	South America / Brazil / Rio de Janeiro	Human	Illumina Miseq / Sanger	B.1.1.33	GR
hCoV-19/Brazil/RJ-INCA-C94/2020	EPI_ISL_513571	2020-04-24	South America / Brazil / Rio de Janeiro	Human	Illumina Miseq / Sanger	B.1.1.33	GR
hCoV-19/Brazil/RJ-INCA-C95/2020	EPI_ISL_513572	2020-04-24	South America / Brazil / Rio de Janeiro	Human	Illumina Miseq / Sanger	B.1.1.33	GR
hCoV-19/Brazil/RJ-INCA-I29/2020	EPI_ISL_513573	2020-05-04	South America / Brazil / Rio de Janeiro	Human	Illumina Miseq / Sanger	B.1.1.33	GR
hCoV-19/Brazil/RJ-INCA-I30/2020	EPI_ISL_513574	2020-05-04	South America / Brazil / Rio de Janeiro	Human	Illumina Miseq / Sanger	B.1.1.33	GR
hCoV-19/Brazil/RJ-INCA-I34/2020	EPI_ISL_513575	2020-05-04	South America / Brazil / Rio de Janeiro	Human	Illumina Miseq / Sanger	B.1.1.33	GR
hCoV-19/Brazil/RJ-INCA-I35/2020	EPI_ISL_513576	2020-05-04	South America / Brazil / Rio de Janeiro	Human	Illumina Miseq / Sanger	B.1.1.33	GR
hCoV-19/Brazil/RJ-INCA-I37/2020	EPI_ISL_513577	2020-05-04	South America / Brazil / Rio de Janeiro	Human	Illumina Miseq / Sanger	B.1.1.33	GR
hCoV-19/Brazil/RJ-INCA-I39/2020	EPI_ISL_513578	2020-05-04	South America / Brazil / Rio de Janeiro	Human	Illumina Miseq / Sanger	B.1.1.248	GR
hCoV-19/Brazil/RJ-INCA-I43/2020	EPI_ISL_513579	2020-05-04	South America / Brazil / Rio de Janeiro	Human	Illumina Miseq / Sanger	B.1.1.33	GR
hCoV-19/Brazil/RJ-INCA-I44/2020	EPI_ISL_513580	2020-05-04	South America / Brazil / Rio de Janeiro	Human	Illumina Miseq / Sanger	B.1.1	GR
hCoV-19/Brazil/RJ-INCA-I51/2020	EPI_ISL_513581	2020-05-05	South America / Brazil / Rio de Janeiro	Human	Illumina Miseq / Sanger	B.1.1.33	GR
hCoV-19/Brazil/RJ-INCA-I54/2020	EPI_ISL_513582	2020-05-05	South America / Brazil / Rio de Janeiro	Human	Illumina Miseq / Sanger	B.1.1.33	GR
hCoV-19/Brazil/RJ-INCA-I57/2020	EPI_ISL_513583	2020-05-05	South America / Brazil / Rio de Janeiro	Human	Illumina Miseq / Sanger	B.1.1.33	GR
hCoV-19/Brazil/RO-01/2020	EPI_ISL_514131	2020-05-11	South America / Brazil / Rondonia / Jaru	Human	Illumina MiSeq	B.1.1.33	GR
hCoV-19/Brazil/RO-02/2020	EPI_ISL_514132	2020-05-11	South America / Brazil / Rondonia / Porto Velho	Human	Illumina MiSeq	B.1.1.33	GR
hCoV-19/Brazil/RO-03/2020	EPI_ISL_514133	2020-05-11	South America / Brazil / Rondonia / Porto Velho	Human	Illumina MiSeq	B.1.1.33	GR
hCoV-19/Brazil/RO-05/2020	EPI_ISL_514135	2020-05-05	South America / Brazil / Rondonia / Porto Velho	Human	Illumina MiSeq	B.1.1.33	GR
hCoV-19/Brazil/RO-07/2020	EPI_ISL_514137	2020-05-05	South America / Brazil / Rondonia / Porto Velho	Human	Illumina MiSeq	B.1.1.33	GR
hCoV-19/Brazil/RO-08/2020	EPI_ISL_514138	2020-06-05	South America / Brazil / Rondonia / Porto Velho	Human	Illumina MiSeq	B.1.1.33	GR
hCoV-19/Brazil/SP-118/2020	EPI_ISL_515520	2020-03-30	South America / Brazil / Sao Paulo / Sao Paulo	Human	Ion Torrent S5	B.1.1.248	GR
hCoV-19/Brazil/SP-120/2020	EPI_ISL_515521	2020-03-28	South America / Brazil / Sao Paulo / Americana	Human	Ion Torrent S5	B.1.1.33	GR
hCoV-19/Brazil/SP-122/2020	EPI_ISL_515522	2020-03-31	South America / Brazil / Sao Paulo / Itatiba	Human	Ion Torrent S5	B.1.1.33	GR
hCoV-19/Brazil/SP-124/2020	EPI_ISL_515523	2020-04-02	South America / Brazil / Sao Paulo / Sao Paulo	Human	Ion Torrent S5	B.1.1.33	GR
hCoV-19/Brazil/SP-125/2020	EPI_ISL_515524	2020-04-01	South America / Brazil / Sao Paulo / Sao Paulo	Human	Ion Torrent S5	B.1.1.28	GR
hCoV-19/Brazil/SP-600/2020	EPI_ISL_515525	2020-06-30	South America / Brazil / Sao Paulo / Sao Paulo	Human	Ion Torrent S5	B.1.1.33	GR
hCoV-19/Brazil/SP-602/2020	EPI_ISL_515526	2020-03-23	South America / Brazil / Sao Paulo / Sao Paulo	Human	Ion Torrent S5	B.1.1	GR
hCoV-19/Brazil/SP-624/2020	EPI_ISL_515527	2020-03-18	South America / Brazil / Sao Paulo / Sao Paulo	Human	Ion Torrent S5	B.1.1.33	GR
hCoV-19/Brazil/SP-625/2020	EPI_ISL_515528	2020-03-25	South America / Brazil / Sao Paulo / Sao Paulo	Human	Ion Torrent S5	B.1.1.33	GR
hCoV-19/Brazil/SP-626/2020	EPI_ISL_515529	2020-03-24	South America / Brazil / Sao Paulo / Sao Paulo	Human	Ion Torrent S5	B.1.1.28	GR
hCoV-19/Brazil/SP-627/2020	EPI_ISL_515541	2020-03-23	South America / Brazil / Sao Paulo / Sao Paulo	Human	Ion Torrent S5	B.1.1.28	GR
hCoV-19/Brazil/SP-136/2020	EPI_ISL_515542	2020-04-20	South America / Brazil / Sao Paulo / Peruibe	Human	Ion Torrent S5	B.1.1.94	GR
hCoV-19/Brazil/SP-137/2020	EPI_ISL_515543	2020-04-01	South America / Brazil / Sao Paulo / Guarujá	Human	Ion Torrent S5	B.1.1.33	GR
hCoV-19/Brazil/SP-629/2020	EPI_ISL_515544	2020-03-23	South America / Brazil / Sao Paulo / Sao Paulo	Human	Ion Torrent S5	B.1.1.28	GR
hCoV-19/Brazil/SP-533/2020	EPI_ISL_515545	2020-03-22	South America / Brazil / Sao Paulo / Sao Paulo	Human	Ion Torrent S5	B.1.1.143	GR
hCoV-19/Brazil/SP-632/2020	EPI_ISL_515546	2020-03-19	South America / Brazil / Sao Paulo / Sao Paulo	Human	Ion Torrent S5	B.1.1.143	GR
hCoV-19/Brazil/SP-633/2020	EPI_ISL_515547	2020-03-20	South America / Brazil / Sao Paulo / Sao Paulo	Human	Ion Torrent S5	B.1.1.28	GR
hCoV-19/Brazil/SP-634/2020	EPI_ISL_515548	2020-03-20	South America / Brazil / Sao Paulo / Sao Paulo	Human	Ion Torrent S5	B.1.1.248	GR
hCoV-19/Brazil/SP-636/2020	EPI_ISL_515550	2020-03-25	South America / Brazil / Sao Paulo / Sao Paulo	Human	Ion Torrent S5	B.1.1.33	GR
hCoV-19/Brazil/SP-544/2020	EPI_ISL_515551	2020-03-22	South America / Brazil / Sao Paulo / Sao Paulo	Human	Ion Torrent S5	B.1.1.28	GR
hCoV-19/Brazil/SP-611/2020	EPI_ISL_515552	2020-04-16	South America / Brazil / Sao Paulo / Sao Paulo	Human	Ion Torrent S5	B.1.1.28	GR
hCoV-19/Brazil/SP-612/2020	EPI_ISL_515553	2020-04-16	South America / Brazil / Sao Paulo / Sao Paulo	Human	Ion Torrent S5	B.1.1.248	GR
hCoV-19/Brazil/SP-639/2020	EPI_ISL_515554	2020-03-19	South America / Brazil / Sao Paulo / Sao Paulo	Human	Ion Torrent S5	B.1.1.28	GR
hCoV-19/Brazil/SP-154/2020	EPI_ISL_515555	2020-03-24	South America / Brazil / Sao Paulo / Sao Paulo	Human	Ion Torrent S5	B.1.1.28	GR
hCoV-19/Brazil/SP-615/2020	EPI_ISL_515557	2020-04-15	South America / Brazil / Sao Paulo / Sao Paulo	Human	Ion Torrent S5	B.1.1.314	GR
hCoV-19/Brazil/SP-155/2020	EPI_ISL_515559	2020-04-18	South America / Brazil / Sao Paulo / Sao Paulo	Human	Ion Torrent S5	B.1.1.248	GR
hCoV-19/Brazil/SP-156/2020	EPI_ISL_515560	2020-04-19	South America / Brazil / Sao Paulo / Sao Paulo	Human	Ion Torrent S5	B.1.1.94	GR
hCoV-19/Brazil/SP-617/2020	EPI_ISL_515561	2020-04-16	South America / Brazil / Sao Paulo / Sao Paulo	Human	Ion Torrent S5	B.1.1.248	GR
hCoV-19/Brazil/SP-619/2020	EPI_ISL_515562	2020-04-13	South America / Brazil / Sao Paulo / Sao Vicente	Human	Ion Torrent S5	B.1.1.248	GR
hCoV-19/Brazil/SP-159/2020	EPI_ISL_515563	2020-04-16	South America / Brazil / Sao Paulo / Sao Paulo	Human	Ion Torrent S5	B.1.1.248	GR
hCoV-19/Brazil/SP-187/2020	EPI_ISL_515564	2020-03-24	South America / Brazil / Sao Paulo / Sao Paulo	Human	Ion Torrent S5	B.1.1.143	GR
hCoV-19/Brazil/SP-188/2020	EPI_ISL_515565	2020-03-24	South America / Brazil / Sao Paulo / Sao Paulo	Human	Ion Torrent S5	B.1.1.28	GR
hCoV-19/Brazil/SP-623/2020	EPI_ISL_515566	2020-04-23	South America / Brazil / Sao Paulo / Sao Paulo	Human	Ion Torrent S5	B.1.1.248	GR
hCoV-19/Brazil/SP-128/2020	EPI_ISL_523955	2020-04-02	South America / Brazil / Sao Paulo / Sao Paulo	Human	Ion Torrent S5	B.1.1.248	GR
hCoV-19/Brazil/SP-132/2020	EPI_ISL_523956	2020-03-31	South America / Brazil / Sao Paulo / Assis	Human	Ion Torrent S5	B.1.1.314	GR
hCoV-19/Brazil/SP-133/2020	EPI_ISL_523957	2020-04-04	South America / Brazil / Sao Paulo / Sao Paulo	Human	Ion Torrent S5	B.1.1.248	GR
hCoV-19/Brazil/SP-162/2020	EPI_ISL_523958	2020-04-15	South America / Brazil / Sao Paulo / Sao Paulo	Human	Ion Torrent S5	B.1.1.248	GR
hCoV-19/Brazil/SP-163/2020	EPI_ISL_523959	2020-08-15	South America / Brazil / Sao Paulo / Sao Paulo	Human	Ion Torrent S5	B.1.1.33	GR
hCoV-19/Brazil/SP-164/2020	EPI_ISL_523961	2020-04-17	South America / Brazil / Sao Paulo / Sao Paulo	Human	Ion Torrent S5	B.1.1.33	GR
hCoV-19/Brazil/SP-166/2020	EPI_ISL_523965	2020-03-19	South America / Brazil / Sao Paulo / Sao Paulo	Human	Ion Torrent S5	B.1.1.28	GR
hCoV-19/Brazil/SP-168/2020	EPI_ISL_523967	2020-04-18	South America / Brazil / Sao Paulo / Sao Paulo	Human	Ion Torrent S5	B.1.1.143	GR
hCoV-19/Brazil/SP-170/2020	EPI_ISL_523969	2020-03-31	South America / Brazil / Sao Paulo / Sao Paulo	Human	Ion Torrent S5	B.1.1.28	GR
hCoV-19/Brazil/SP-171/2020	EPI_ISL_523970	2020-04-02	South America / Brazil / Sao Paulo / Sao Paulo	Human	Ion Torrent S5	B.1.1.248	GR
hCoV-19/Brazil/SP-174/2020	EPI_ISL_523971	2020-03-25	South America / Brazil / Sao Paulo / Sao Paulo	Human	Ion Torrent S5	B.1.1.248	GR
hCoV-19/Brazil/SP-177/2020	EPI_ISL_523973	2020-04-03	South America / Brazil / Sao Paulo / Sao Paulo	Human	Ion Torrent S5	B.1.1.33	GR
hCoV-19/Brazil/SP-178/2020	EPI_ISL_523974	2020-04-02	South America / Brazil / Sao Paulo / Sao Paulo	Human	Ion Torrent S5	B.1.1.28	GR
hCoV-19/Brazil/SP-179/2020	EPI_ISL_523975	2020-04-03	South America / Brazil / Sao Paulo / Sao Paulo	Human	Ion Torrent S5	B.1.1.28	GR
hCoV-19/Brazil/SP-181/2020	EPI_ISL_523976	2020-04-10	South America / Brazil / Sao Paulo / Sao Paulo	Human	Ion Torrent S5	B.1.1.33	GR
hCoV-19/Brazil/SP-182/2020	EPI_ISL_523977	2020-04-10	South America / Brazil / Sao Paulo / Sao Paulo	Human	Ion Torrent S5	B.1.1.248	GR
hCoV-19/Brazil/SP-195/2020	EPI_ISL_523978	2020-04-10	South America / Brazil / Sao Paulo / Sao Paulo	Human	Ion Torrent S5	B.1.1.28	GR
hCoV-19/Brazil/SP-199/2020	EPI_ISL_523980	2020-04-02	South America / Brazil / Sao Paulo / Sao Paulo	Human	Ion Torrent S5	B.1.1.28	GR
hCoV-19/Brazil/SP-200/2020	EPI_ISL_523981	2020-04-10	South America / Brazil / Sao Paulo / Sao Paulo	Human	Ion Torrent S5	B.1.1.248	GR
hCoV-19/Brazil/SP-190/2020	EPI_ISL_523982	2020-03-25	South America / Brazil / Sao Paulo / Sao Paulo	Human	Ion Torrent S5	B.1.1.28	GR
hCoV-19/Brazil/SP-191/2020	EPI_ISL_523983	2020-04-16	South America / Brazil / Sao Paulo / Sao Paulo	Human	Ion Torrent S5	B.1.1.248	GR
hCoV-19/Brazil/SP-193/2020	EPI_ISL_523984	2020-04-19	South America / Brazil / Sao Paulo / Sao Paulo	Human	Ion Torrent S5	B.1.1.248	GR
hCoV-19/Brazil/SP-202/2020	EPI_ISL_523985	2020-04-18	South America / Brazil / Sao Paulo / Sao Paulo	Human	Ion Torrent S5	B.1.1.143	GR
hCoV-19/Brazil/SP-203/2020	EPI_ISL_523986	2020-04-23	South America / Brazil / Sao Paulo / Sao Paulo	Human	Ion Torrent S5	B.1.1.28	GR
hCoV-19/Brazil/SP-205/2020	EPI_ISL_523988	2020-04-21	South America / Brazil / Sao Paulo / Sao Paulo	Human	Ion Torrent S5	B.1.1.248	GR
hCoV-19/Brazil/SP-208/2020	EPI_ISL_523989	2020-04-20	South America / Brazil / Sao Paulo / Sao Paulo	Human	Ion Torrent S5	B.1.1.248	GR
hCoV-19/Brazil/SP-209/2020	EPI_ISL_523990	2020-04-19	South America / Brazil / Sao Paulo / Sao Paulo	Human	Ion Torrent S5	B.1.1.28	GR
hCoV-19/Brazil/SP-211/2020	EPI_ISL_523991	2020-04-22	South America / Brazil / Sao Paulo / Sao Paulo	Human	Ion Torrent S5	B.1.1.33	GR
hCoV-19/Brazil/SP-213/2020	EPI_ISL_523992	2020-04-23	South America / Brazil / Sao Paulo / Sao Paulo	Human	Ion Torrent S5	B.1.1.33	GR
hCoV-19/Brazil/SP-217/2020	EPI_ISL_523993	2020-04-17	South America / Brazil / Sao Paulo / Sao Paulo	Human	Ion Torrent S5	B.1.1.143	GR
hCoV-19/Brazil/SP-272/2020	EPI_ISL_524462	2020-03-17	South America / Brazil / Sao Paulo / Sao Paulo	Human	Ion Torrent S5	B.1.1.28	GR
hCoV-19/Brazil/SP-275/2020	EPI_ISL_524463	2020-03-20	South America / Brazil / Sao Paulo / Sao Paulo	Human	Ion Torrent S5	B.1.1.28	GR
hCoV-19/Brazil/SP-276/2020	EPI_ISL_524464	2020-03-21	South America / Brazil / Sao Paulo / Santa Isabel	Human	Ion Torrent S5	B.1.1.248	GR
hCoV-19/Brazil/SP-511/2020	EPI_ISL_524465	2020-04-17	South America / Brazil / Sao Paulo / Sao Paulo	Human	Ion Torrent S5	B.1.1.248	GR
hCoV-19/Brazil/SP-262/2020	EPI_ISL_524466	2020-04-22	South America / Brazil / Sao Paulo / Sao Paulo	Human	Ion Torrent S5	B.1.1.28	GR
hCoV-19/Brazil/SP-263/2020	EPI_ISL_524467	2020-04-22	South America / Brazil / Sao Paulo / Sao Paulo	Human	Ion Torrent S5	B.1.1.33	GR
hCoV-19/Brazil/SP-240/2020	EPI_ISL_524468	2020-05-01	South America / Brazil / Sao Paulo / Sao Paulo	Human	Ion Torrent S5	B.1.1.248	GR
hCoV-19/Brazil/SP-254/2020	EPI_ISL_524469	2020-05-05	South America / Brazil / Sao Paulo / Sao Paulo	Human	Ion Torrent S5	B.1.1.248	GR
hCoV-19/Brazil/SP-259/2020	EPI_ISL_524470	2020-05-06	South America / Brazil / Sao Paulo / Sao Paulo	Human	Ion Torrent S5	B.1.1.33	GR
hCoV-19/Brazil/PA-IEC-164747/2020	EPI_ISL_524783	2020-04-28	South America / Brazil / Para	Human	Illumina NextSeq	B.1.1.248	GR
hCoV-19/Brazil/AP-IEC-165513/2020	EPI_ISL_524784	2020-04-29	South America / Brazil / Amapa	Human	Illumina NextSeq	B.1.1.33	GR
hCoV-19/Brazil/PA-IEC-165313/2020	EPI_ISL_524785	2020-05-05	South America / Brazil / Para	Human	Illumina NextSeq	B.1.1.248	GR
hCoV-19/Brazil/PA-IEC-165302/2020	EPI_ISL_524786	2020-05-01	South America / Brazil / Para	Human	Illumina NextSeq	B.1.1.248	GR
hCoV-19/Brazil/PA-IEC-163469/2020	EPI_ISL_524787	2020-04-15	South America / Brazil / Para	Human	Illumina NextSeq	B.1.1.28	GR
hCoV-19/Brazil/MA-IEC-164827/2020	EPI_ISL_524788	2020-04-24	South America / Brazil / Maranhao	Human	Illumina NextSeq	B.1.1.33	GR
hCoV-19/Brazil/MA-IEC-166716/2020	EPI_ISL_524789	2020-05-05	South America / Brazil / Maranhao	Human	Illumina NextSeq	B.1.1.33	GR
hCoV-19/Brazil/MA-IEC-165398/2020	EPI_ISL_524790	2020-04-28	South America / Brazil / Maranhao	Human	Illumina NextSeq	B.1.1.33	GR
hCoV-19/Brazil/MA-IEC-162466/2020	EPI_ISL_524791	2020-04-29	South America / Brazil / Maranhao	Human	Illumina NextSeq	B.1.1.33	GR
hCoV-19/Brazil/AP-IEC-162620/2020	EPI_ISL_524792	2020-04-03	South America / Brazil / Amapa	Human	Illumina NextSeq	B.1.1.33	GR
hCoV-19/Brazil/AP-IEC-165669/2020	EPI_ISL_524793	2020-04-29	South America / Brazil / Amapa	Human	Illumina NextSeq	B.1.1.33	GR
hCoV-19/Brazil/MA-IEC-165425/2020	EPI_ISL_524794	2020-04-25	South America / Brazil / Maranhao	Human	Illumina NextSeq	B.1.1.33	GR
hCoV-19/Brazil/AP-IEC-163359/2020	EPI_ISL_524795	2020-04-09	South America / Brazil / Amapa	Human	Illumina NextSeq	B.1.1.33	GR
hCoV-19/Brazil/AP-IEC-164920/2020	EPI_ISL_524796	2020-04-23	South America / Brazil / Amapa	Human	Illumina NextSeq	B.1.1.33	GR
hCoV-19/Brazil/MA-IEC-162157/2020	EPI_ISL_524797	2020-03-24	South America / Brazil / Maranhao	Human	Illumina NextSeq	B.1.1.33	GR
hCoV-19/Brazil/RN-IEC-162277/2020	EPI_ISL_524798	2020-03-14	South America / Brazil / Rio Grande do Norte	Human	Illumina NextSeq	B.1.1.33	GR
hCoV-19/Brazil/MA-IEC-166867/2020	EPI_ISL_524799	2020-05-08	South America / Brazil / Maranhao	Human	Illumina NextSeq	B.1.1.33	GR
hCoV-19/Brazil/SP-292/2020	EPI_ISL_527856	2020-04-16	South America / Brazil / Sao Paulo / Sao Paulo	Human	Ion Torrent S5	B.1.1.248	GR
hCoV-19/Brazil/SP-293/2020	EPI_ISL_527857	2020-04-17	South America / Brazil / Sao Paulo / Itariri	Human	Ion Torrent S5	B.1.1.248	GR
hCoV-19/Brazil/SP-279/2020	EPI_ISL_527858	2020-03-23	South America / Brazil / Sao Paulo / Sao Paulo	Human	Ion Torrent S5	B.1.1.33	GR
hCoV-19/Brazil/SP-282/2020	EPI_ISL_527859	2020-04-21	South America / Brazil / Sao Paulo / Sao Paulo	Human	Ion Torrent S5	B.1.1.28	GR
hCoV-19/Brazil/SP-283/2020	EPI_ISL_527860	2020-04-17	South America / Brazil / Sao Paulo / Sao Paulo	Human	Ion Torrent S5	B.1.1.28	GR
hCoV-19/Brazil/SP-298/2020	EPI_ISL_527861	2020-04-20	South America / Brazil / Sao Paulo / Campinas	Human	Ion Torrent S5	B.1.1.248	GR
hCoV-19/Brazil/SP-294/2020	EPI_ISL_527862	2020-03-30	South America / Brazil / Sao Paulo / Guarulhos	Human	Ion Torrent S5	B.1.1.248	GR
hCoV-19/Brazil/SP-287/2020	EPI_ISL_527863	2020-04-12	South America / Brazil / Sao Paulo / Sao Paulo	Human	Ion Torrent S5	B.1.1.248	GR
hCoV-19/Brazil/SP-299/2020	EPI_ISL_527864	2020-04-24	South America / Brazil / Sao Paulo / Sao Paulo	Human	Ion Torrent S5	B.1.1.33	GR
hCoV-19/Brazil/SP-218/2020	EPI_ISL_527865	2020-04-22	South America / Brazil / Sao Paulo / Sao Paulo	Human	Ion Torrent S5	B.1.1.248	GR
hCoV-19/Brazil/SP-221/2020	EPI_ISL_527866	2020-04-21	South America / Brazil / Sao Paulo / Sao Paulo	Human	Ion Torrent S5	B.1.1.248	GR
hCoV-19/Brazil/SP-225/2020	EPI_ISL_527867	2020-04-22	South America / Brazil / Sao Paulo / Sao Paulo	Human	Ion Torrent S5	B.1.1.33	GR
hCoV-19/Brazil/SP-226/2020	EPI_ISL_527868	2020-04-17	South America / Brazil / Sao Paulo / Sao Paulo	Human	Ion Torent S5	B.1.1.248	GR
hCoV-19/Brazil/SP-300/2020	EPI_ISL_527869	2020-04-22	South America / Brazil / Sao Paulo / Sao Paulo	Human	Ion Torrent S5	B.1.1.33	GR
hCoV-19/Brazil/SP-301/2020	EPI_ISL_527870	2020-04-26	South America / Brazil / Sao Paulo / Campinas	Human	Ion Torrent S5	B.1.1.248	GR
hCoV-19/Brazil/RJ-MD63-1a/2020	EPI_ISL_528637	2020-03-16	South America / Brazil / Rio de Janeiro	Human	Illumina MiSeq	B.1.1.33	GR
hCoV-19/Brazil/RJ-MD63-1b/2020	EPI_ISL_528638	2020-03-16	South America / Brazil / Rio de Janeiro	Human	Illumina MiSeq	B.1.1.33	GR
hCoV-19/Brazil/SP-309/2020	EPI_ISL_534311	2020-04-27	South America / Brazil / Sao Paulo / Sao Paulo	Human	Ion Torrent S5	B.1.1.248	GR
hCoV-19/Brazil/SP-315/2020	EPI_ISL_534312	2020-05-01	South America / Brazil / Sao Paulo / Campinas	Human	Ion Torrent S5	B.1.1.33	GR
hCoV-19/Brazil/SP-316/2020	EPI_ISL_534313	2020-04-02	South America / Brazil / Sao Paulo / Rio Verde	Human	Ion Torrent S5	B.1.1.314	GR
hCoV-19/Brazil/SP-317/2020	EPI_ISL_534314	2020-05-04	South America / Brazil / Sao Paulo / Sao Paulo	Human	Ion Torrent S5	B.1.1.28	GR
hCoV-19/Brazil/SP-318/2020	EPI_ISL_534315	2020-05-02	South America / Brazil / Sao Paulo / Guarulhos	Human	Ion Torrent S5	B.1.1.33	GR
hCoV-19/Brazil/SP-321/2020	EPI_ISL_534316	2020-05-02	South America / Brazil / Sao Paulo	Human	Ion Torrent S5	B.1.1.248	GR
hCoV-19/Brazil/SP-324/2020	EPI_ISL_534317	2020-05-05	South America / Brazil / Sao Paulo / Jandira	Human	Ion Torrent S5	B.1.1.248	GR
hCoV-19/Brazil/SP-325/2020	EPI_ISL_534318	2020-05-03	South America / Brazil / Sao Paulo / Osasco	Human	Ion Torrent S5	B.1.1.248	GR
hCoV-19/Brazil/SP-255/2020	EPI_ISL_534319	2020-05-06	South America / Brazil / Sao Paulo / Sao Paulo	Human	Ion Torrent S5	B.1.1.28	GR
hCoV-19/Brazil/SP-256/2020	EPI_ISL_534320	2020-05-05	South America / Brazil / Sao Paulo / Sao Paulo	Human	Ion Torrent S5	B.1.1.248	GR
hCoV-19/Brazil/SP-329/2020	EPI_ISL_534321	2020-05-07	South America / Brazil / Sao Paulo / Barueri	Human	Ion Torrent S5	B.1.1.248	GR
hCoV-19/Brazil/SP-302/2020	EPI_ISL_534322	2020-04-24	South America / Brazil / Sao Paulo / Sao Paulo	Human	Ion Torrent S5	B.1.1.248	GR
hCoV-19/Brazil/SP-304/2020	EPI_ISL_534323	2020-04-25	South America / Brazil / Sao Paulo / Sao Paulo	Human	Ion Torrent S5	B.1.1.33	GR
hCoV-19/Brazil/SP-305/2020	EPI_ISL_534324	2020-04-25	South America / Brazil / Sao Paulo / Sao Paulo	Human	Ion Torrent S5	B.1.1.143	GR
hCoV-19/Brazil/SP-306/2020	EPI_ISL_534325	2020-04-25	South America / Brazil / Sao Paulo / Guarulhos	Human	Ion Torrent S5	B.1.1.33	GR
hCoV-19/Brazil/SP-340/2020	EPI_ISL_534326	2020-05-01	South America / Brazil / Sao Paulo / Cotia	Human	Ion Torrent S5	B.1.1.248	GR
hCoV-19/Brazil/PR-5620/2020	EPI_ISL_541343	2020-03-20	South America / Brazil / Parana / Maringa	Human	Illumina MiSeq	B.1.1.248	GR
hCoV-19/Brazil/PR-5621/2020	EPI_ISL_541344	2020-03-19	South America / Brazil / Parana / Vere	Human	Illumina MiSeq	B.1.1.28	GR
hCoV-19/Brazil/RJ-1783/2020	EPI_ISL_541347	2020-04-04	South America / Brazil / Rio de Janeiro / Rio de Janeiro	Human	Illumina MiSeq	B.1.1.33	GR
hCoV-19/Brazil/RJ-1798/2020	EPI_ISL_541348	2020-04-06	South America / Brazil / Rio de Janeiro / Mesquita	Human	Illumina MiSeq	B.1.1.33	GR
hCoV-19/Brazil/RJ-1830/2020	EPI_ISL_541349	2020-04-04	South America / Brazil / Rio de Janeiro / Sao Goncalo	Human	Illumina MiSeq	B.1.1.33	GR
hCoV-19/Brazil/RJ-1862/2020	EPI_ISL_541350	2020-04-04	South America / Brazil / Rio de Janeiro / Rio de Janeiro	Human	Illumina MiSeq	B.1.1.33	GR
hCoV-19/Brazil/RJ-1953/2020	EPI_ISL_541352	2020-04-13	South America / Brazil / Rio de Janeiro / Rio de Janeiro	Human	IonTorrent	B.1.1.33	GR
hCoV-19/Brazil/RJ-2100/2020	EPI_ISL_541353	2020-04-16	South America / Brazil / Rio de Janeiro / Rio de Janeiro	Human	Illumina MiSeq	B.1.1.33	GR
hCoV-19/Brazil/RJ-2155/2020	EPI_ISL_541354	2020-04-07	South America / Brazil / Rio de Janeiro / Niteroi	Human	Illumina MiSeq	B.1.1.248	GR
hCoV-19/Brazil/RJ-2192/2020	EPI_ISL_541355	2020-04-13	South America / Brazil / Rio de Janeiro / Rio de Janeiro	Human	Illumina MiSeq	B.1.1.248	GR
hCoV-19/Brazil/RJ-2231/2020	EPI_ISL_541356	2020-04-17	South America / Brazil / Rio de Janeiro / Rio de Janeiro	Human	IonTorrent	B.1.1.33	GR
hCoV-19/Brazil/RJ-2342/2020	EPI_ISL_541357	2020-04-20	South America / Brazil / Rio de Janeiro	Human	Illumina MiSeq	B.1.1.33	GR
hCoV-19/Brazil/RJ-2343/2020	EPI_ISL_541358	2020-04-20	South America / Brazil / Rio de Janeiro	Human	Illumina MiSeq	B.1.1.33	GR
hCoV-19/Brazil/RJ-2369/2020	EPI_ISL_541359	2020-04-20	South America / Brazil / Rio de Janeiro / Rio de Janeiro	Human	IonTorrent	B.1.1.28	GR
hCoV-19/Brazil/RJ-2376/2020	EPI_ISL_541360	2020-04-20	South America / Brazil / Rio de Janeiro / Niteroi	Human	IonTorrent	B.1.1.33	GR
hCoV-19/Brazil/RJ-2377/2020	EPI_ISL_541361	2020-04-20	South America / Brazil / Rio de Janeiro / Rio de Janeiro	Human	IonTorrent	B.1.1.33	GR
hCoV-19/Brazil/RJ-2903/2020	EPI_ISL_541362	2020-04-28	South America / Brazil / Rio de Janeiro / Rio de Janeiro	Human	Illumina MiSeq	B.1.1.33	GR
hCoV-19/Brazil/RJ-2904/2020	EPI_ISL_541363	2020-04-28	South America / Brazil / Rio de Janeiro / Rio de Janeiro	Human	Illumina MiSeq	B.1.1.33	GR
hCoV-19/Brazil/RJ-2938/2020	EPI_ISL_541364	2020-04-29	South America / Brazil / Rio de Janeiro / Rio de Janeiro	Human	IonTorrent	B.1.1.33	GR
hCoV-19/Brazil/RJ-2950/2020	EPI_ISL_541365	2020-04-29	South America / Brazil / Rio de Janeiro / Rio de Janeiro	Human	IonTorrent	B.1.1.33	GR
hCoV-19/Brazil/RJ-2951/2020	EPI_ISL_541366	2020-04-29	South America / Brazil / Rio de Janeiro / Rio de Janeiro	Human	IonTorrent	B.1.1.314	GR
hCoV-19/Brazil/RJ-2966/2020	EPI_ISL_541367	2020-04-29	South America / Brazil / Rio de Janeiro / Rio de Janeiro	Human	Illumina MiSeq	B.1.1.33	GR
hCoV-19/Brazil/RJ-2999/2020	EPI_ISL_541368	2020-04-30	South America / Brazil / Rio de Janeiro / Niteroi	Human	IonTorrent	B.1.1.314	GR
hCoV-19/Brazil/RJ-3021/2020	EPI_ISL_541369	2020-04-30	South America / Brazil / Rio de Janeiro / Rio de Janeiro	Human	IonTorrent	B.1.1.33	GR
hCoV-19/Brazil/SC-770/2020	EPI_ISL_541370	2020-03-12	South America / Brazil / Santa Catarina / Braco do Norte	Human	Illumina MiSeq	B.1.1.33	GR
hCoV-19/Brazil/SE-6529/2020	EPI_ISL_541372	2020-03-27	South America / Brazil / Sergipe / Aracaju	Human	Illumina MiSeq	B.1.1.248	GR
hCoV-19/Brazil/SE-6530/2020	EPI_ISL_541373	2020-03-20	South America / Brazil / Sergipe / Aracaju	Human	Illumina MiSeq	B.1.1	GR
hCoV-19/Brazil/SE-6533/2020	EPI_ISL_541374	2020-03-19	South America / Brazil / Sergipe / Aracaju	Human	Illumina MiSeq	B.1.1	GR
hCoV-19/Brazil/SE-6536/2020	EPI_ISL_541376	2020-03-19	South America / Brazil / Sergipe / Nossa Senhora da Gloria	Human	Illumina MiSeq	B.1.1.33	GR
hCoV-19/Brazil/SE-6544/2020	EPI_ISL_541378	2020-04-26	South America / Brazil / Sergipe / Estancia	Human	Illumina MiSeq	B.1.1	GR
hCoV-19/Brazil/SE-6556/2020	EPI_ISL_541382	2020-04-27	South America / Brazil / Sergipe / Itaporanga Dajuda	Human	Illumina MiSeq	B.1.1.33	GR
hCoV-19/Brazil/SE-6561/2020	EPI_ISL_541384	2020-04-27	South America / Brazil / Sergipe / Nossa Senhora do Socorro	Human	Illumina MiSeq	B.1.1	GR
hCoV-19/Brazil/SE-6563/2020	EPI_ISL_541385	2020-04-26	South America / Brazil / Sergipe / Aracaju	Human	Illumina MiSeq	B.1.1.33	GR
hCoV-19/Brazil/SE-6567/2020	EPI_ISL_541386	2020-04-24	South America / Brazil / Sergipe / Aracaju	Human	Illumina MiSeq	B.1.1.248	GR
hCoV-19/Brazil/SE-6579/2020	EPI_ISL_541388	2020-04-20	South America / Brazil / Sergipe / Aracaju	Human	Illumina MiSeq	B.1.1.33	GR
hCoV-19/Brazil/SE-6603/2020	EPI_ISL_541393	2020-04-21	South America / Brazil / Sergipe / Tomar do Geru	Human	Illumina MiSeq	B.1.1	GR
hCoV-19/Brazil/SP-314/2020	EPI_ISL_547570	2020-04-30	South America / Brazil / Sao Paulo / Sao Paulo	Human	Ion Torrent S5	B.1.1.33	GR
hCoV-19/Brazil/SP-341/2020	EPI_ISL_547571	2020-06-01	South America / Brazil / Sao Paulo / Maua	Human	Ion Torrent S5	B.1.1.33	GR
hCoV-19/Brazil/SP-342/2020	EPI_ISL_547573	2020-06-01	South America / Brazil / Sao Paulo / Cajamar	Human	Ion Torrent S5	B.1.1.248	GR
hCoV-19/Brazil/SP-354/2020	EPI_ISL_547574	2020-06-19	South America / Brazil / Sao Paulo / Taboao da Serra	Human	Ion Torrent S5	B.1.1.33	GR
hCoV-19/Brazil/SP-356/2020	EPI_ISL_547575	2020-06-16	South America / Brazil / Sao Paulo / Jundiai	Human	Ion Torrent S5	B.1.1	GR
hCoV-19/Brazil/SP-358/2020	EPI_ISL_547576	2020-06-23	South America / Brazil / Sao Paulo / Birigui	Human	Ion Torrent S5	B.1.1.143	GR
hCoV-19/Brazil/SP-405/2020	EPI_ISL_547577	2020-07-06	South America / Brazil / Sao Paulo / Presidente Prudente	Human	ion Torrent S5	B.1.1	GR
hCoV-19/Brazil/SP-406/2020	EPI_ISL_547578	2020-07-05	South America / Brazil / Sao Paulo / Presidente Prudente	Human	Ion Torrent S5	B.1.1.33	GR
hCoV-19/Brazil/SP-417/2020	EPI_ISL_547579	2020-07-07	South America / Brazil / Sao Paulo / Araçatuba	Human	Ion Torrent S5	B.1.1.28	GR
hCoV-19/Brazil/SP-418/2020	EPI_ISL_547580	2020-07-09	South America / Brazil / Sao Paulo / Euclides da Cunha Paulista	Human	Ion Torrent S5	B.1.1.33	GR
hCoV-19/Brazil/PE-IAM109/2020	EPI_ISL_572334	2020-04-08	South America / Brazil / Pernambuco / Olinda	Human	Illumina MiSeq	B.1.1	GR
hCoV-19/Brazil/PE-IAM383/2020	EPI_ISL_572335	2020-04-20	South America / Brazil / Pernambuco / Jaboatao dos Guararapes	Human	Illumina MiSeq	B.1.1	GR
hCoV-19/Brazil/PE-IAM711/2020	EPI_ISL_572351	2020-04-26	South America / Brazil / Pernambuco / Recife	Human	Illumina MiSeq	B.1.1	GR
hCoV-19/Brazil/PE-IAM719/2020	EPI_ISL_572353	2020-04-27	South America / Brazil / Pernambuco / Recife	Human	Illumina MiSeq	B.1.1	GR
hCoV-19/Brazil/PE-IAM961/2020	EPI_ISL_572366	2020-05-02	South America / Brazil / Pernambuco / Carpina	Human	Illumina MiSeq	B.1.1	GR
hCoV-19/Brazil/PE-IAM991/2020	EPI_ISL_572371	2020-05-06	South America / Brazil / Pernambuco / Recife	Human	Illumina MiSeq	B.1.1.248	GR
hCoV-19/Brazil/PE-IAM1309/2020	EPI_ISL_572386	2020-05-10	South America / Brazil / Pernambuco / Ipojuca	Human	Illumina MiSeq	B.1.1	GR
hCoV-19/Brazil/SP-445/2020	EPI_ISL_574577	2020-04-16	South America / Brazil / Sao Paulo / Sao Paulo	Human	Ion Torrent S5	B.1.1.248	GR
hCoV-19/Brazil/SP-470/2020	EPI_ISL_574578	2020-04-25	South America / Brazil / Sao Paulo / Campinas	Human	Ion Torrent S5	B.1.1.248	GR
hCoV-19/Brazil/SP-476/2020	EPI_ISL_574579	2020-04-24	South America / Brazil / Sao Paulo / Sao Paulo	Human	Ion Torrent S5	B.1.1.248	GR
hCoV-19/Brazil/SP-481/2020	EPI_ISL_574580	2020-04-20	South America / Brazil / Sao Paulo / Sao Paulo	Human	Ion Torrent S5	B.1.1.248	GR
hCoV-19/Brazil/SP-483/2020	EPI_ISL_574582	2020-04-24	South America / Brazil / Sao Paulo / Sao Paulo	Human	Ion Torrent	B.1.1.248	GR
hCoV-19/Brazil/SP-486/2020	EPI_ISL_574583	2020-04-27	South America / Brazil / Sao Paulo / Jandira	Human	Ion Torrent S5	B.1.1.248	GR
hCoV-19/Brazil/SP-492/2020	EPI_ISL_574588	2020-04-27	South America / Brazil / Sao Paulo / Sumare	Human	Ion Torrent S5	B.1.1.28	GR
hCoV-19/Brazil/SP-494/2020	EPI_ISL_574589	2020-04-26	South America / Brazil / Sao Paulo / Sao Paulo	Human	Ion Torrent S5	B.1.1.248	GR
hCoV-19/Brazil/SP-496/2020	EPI_ISL_574590	2020-04-26	South America / Brazil / Sao Paulo / Santa Isabel	Human	Ion Torrent S5	B.1.1.248	GR
hCoV-19/Brazil/SP-559/2020	EPI_ISL_574591	2020-04-01	South America / Brazil / Sao Paulo / Presidente Prudente	Human	Ion Torrent S5	B.1.1.248	GR
hCoV-19/Brazil/SP-560/2020	EPI_ISL_574592	2020-03-31	South America / Brazil / Sao Paulo / Presidente Prudente	Human	Ion Torrent S5	B.1.1.28	GR
hCoV-19/Brazil/SP-564/2020	EPI_ISL_574593	2020-04-30	South America / Brazil / Sao Paulo / Sumare	Human	Ion Torrent S5	B.1.1.33	GR
hCoV-19/Brazil/SP-425/2020	EPI_ISL_574594	2020-07-10	South America / Brazil / Sao Paulo / Taubate	Human	Ion Torrent S5	B.1.1.94	GR
hCoV-19/Brazil/SP-444/2020	EPI_ISL_574595	2020-03-23	South America / Brazil / Sao Paulo / Sao Paulo	Human	Ion Torrent S5	B.1.1.143	GR
hCoV-19/Brazil/SP-388/2020	EPI_ISL_574596	2020-06-19	South America / Brazil / Sao Paulo / Sumare	Human	Ion Torrent S5	B.1.1.33	GR
hCoV-19/Brazil/SP-389/2020	EPI_ISL_574597	2020-06-18	South America / Brazil / Sao Paulo / Jarinu	Human	Ion Torrent S5	B.1.1.248	GR
hCoV-19/Brazil/SP-391/2020	EPI_ISL_574598	2020-06-20	South America / Brazil / Sao Paulo / Jundiai	Human	Ion Torrent S5	B.1.1.248	GR
hCoV-19/Brazil/SP-459/2020	EPI_ISL_583490	2020-04-15	South America / Brazil / Sao Paulo / Sumare	Human	Ion Torrent S5	B.1.1.28	GR
hCoV-19/Brazil/SP-460/2020	EPI_ISL_583491	2020-04-15	South America / Brazil / Sao Paulo / Rio Pardo	Human	Ion Torrent S5	B.1.1.33	GR
hCoV-19/Brazil/SP-461/2020	EPI_ISL_583492	2020-04-15	South America / Brazil / Sao Paulo / Amparo	Human	Ion Torrent S5	B.1.1.28	GR
hCoV-19/Brazil/SP-488/2020	EPI_ISL_583493	2020-04-28	South America / Brazil / Sao Paulo / Cajamar	Human	Ion Torrent S5	B.1.1.33	GR
hCoV-19/Brazil/SP-493/2020	EPI_ISL_583494	2020-04-24	South America / Brazil / Sao Paulo / Sumare	Human	Ion Torrent S5	B.1.1.248	GR
hCoV-19/Brazil/SP-345/2020	EPI_ISL_583495	2020-06-13	South America / Brazil / Sao Paulo / Guarulhos	Human	Ion Torrent S5	B.1.1.33	GR
hCoV-19/Brazil/SP-353/2020	EPI_ISL_583496	2020-06-20	South America / Brazil / Sao Paulo / Jandira	Human	Ion Torrent S5	B.1.1.248	GR
hCoV-19/Brazil/SP-359/2020	EPI_ISL_583497	2020-06-17	South America / Brazil / Sao Paulo / Campinas	Human	Ion Torrent S5	B.1.1.28	GR
hCoV-19/Brazil/SP-360/2020	EPI_ISL_583498	2020-06-22	South America / Brazil / Sao Paulo / Americana	Human	Ion Torrent S5	B.1.1.248	GR
hCoV-19/Brazil/SP-368/2020	EPI_ISL_583499	2020-06-24	South America / Brazil / Sao Paulo / Campinas	Human	Ion Torrent S5	B.1.1.143	GR
hCoV-19/Brazil/SP-370/2020	EPI_ISL_583500	2020-06-29	South America / Brazil / Sao Paulo / Presidente Venceslau	Human	Ion Torrent S5	B.1.1.248	GR
hCoV-19/Brazil/SP-393/2020	EPI_ISL_583502	2020-06-21	South America / Brazil / Sao Paulo / Guaruja	Human	Ion Torrent S5	B.1.1.248	GR
hCoV-19/Brazil/SP-394/2020	EPI_ISL_583503	2020-06-22	South America / Brazil / Sao Paulo / Caieiras	Human	Ion Torrent S5	B.1.1.248	GR
hCoV-19/Brazil/SP-395/2020	EPI_ISL_583504	2020-06-20	South America / Brazil / Sao Paulo / Caraguatatuba	Human	Ion Torrent S5	B.1.1.248	GR
hCoV-19/Brazil/SP-397/2020	EPI_ISL_583505	2020-06-26	South America / Brazil / Sao Paulo / Caraguatatuba	Human	Ion Torrent S5	B.1.1.248	GR
hCoV-19/Brazil/SP-427/2020	EPI_ISL_603021	2020-07-15	South America / Brazil / Sao Paulo / Osasco	Human	Ion Torrent S5	B.1.1	GR
hCoV-19/Brazil/SP-429/2020	EPI_ISL_603022	2020-07-16	South America / Brazil / Sao Paulo / Diadema	Human	Ion Torrent S5	B.1.1	GR
hCoV-19/Brazil/SP-376/2020	EPI_ISL_603023	2020-06-07	South America / Brazil / Sao Paulo / Campinas	Human	Ion Torrent S5	B.1.1.248	GR
hCoV-19/Brazil/SP-383/2020	EPI_ISL_603024	2020-06-20	South America / Brazil / Sao Paulo / Aracatuba	Human	Ion Torrent S5	B.1.1.28	GR
hCoV-19/Brazil/SP-384/2020	EPI_ISL_603025	2020-06-11	South America / Brazil / Sao Paulo / Caraguatatuba	Human	Ion Torrent S5	B.1.1.33	GR
hCoV-19/Brazil/SP-385/2020	EPI_ISL_603026	2020-06-21	South America / Brazil / Sao Paulo / Emilianopolis	Human	Ion Torrent S5	B.1.1.33	GR
hCoV-19/Brazil/SP-387/2020	EPI_ISL_603027	2020-06-20	South America / Brazil / Sao Paulo / Aracatuba	Human	Ion Torrent S5	B.1.1.143	GR
hCoV-19/Brazil/SP-398/2020	EPI_ISL_603028	2020-06-30	South America / Brazil / Sao Paulo / Teixeira de Freitas	Human	Ion Torrent S5	B.1.1.248	GR
hCoV-19/Brazil/SP-399/2020	EPI_ISL_603029	2020-06-22	South America / Brazil / Sao Paulo / Campinas	Human	Ion Torrent S5	B.1.1.33	GR
hCoV-19/Brazil/SP-433/2020	EPI_ISL_603030	2020-07-11	South America / Brazil / Sao Paulo / Presidente Epitacio	Human	Ion Torrent S5	B.1.1.248	GR
hCoV-19/Brazil/SP-434/2020	EPI_ISL_603031	2020-07-12	South America / Brazil / Sao Paulo / Presidente Epitacio	Human	Ion Torrent S5	B.1.1.33	GR
hCoV-19/Brazil/SP-435/2020	EPI_ISL_603032	2020-07-13	South America / Brazil / Sao Paulo / Santo Anastacio	Human	Ion Torrent S5	B.1.1.33	GR
hCoV-19/Brazil/SP-436/2020	EPI_ISL_603033	2020-07-13	South America / Brazil / Sao Paulo / Sao Bernardo do Campo	Human	Ion Torrent S5	B.1.1.248	GR
hCoV-19/Brazil/SP-437/2020	EPI_ISL_603034	2020-07-11	South America / Brazil / Sao Paulo / Diadema	Human	Ion Torrent S5	B.1.1.248	GR
hCoV-19/Brazil/SP-438/2020	EPI_ISL_603035	2020-07-10	South America / Brazil / Sao Paulo / Birigui	Human	Ion Torrent S5	B.1.1.143	GR
hCoV-19/Brazil/SP-439/2020	EPI_ISL_603036	2020-07-10	South America / Brazil / Sao Paulo / Santo Andre	Human	Ion Torrent S5	B.1.1.248	GR
hCoV-19/Brazil/SP-440/2020	EPI_ISL_603037	2020-07-20	South America / Brazil / Sao Paulo / Sao Paulo	Human	Ion Torrent S5	B.1.1.248	GR
hCoV-19/Brazil/SP-441/2020	EPI_ISL_603038	2020-07-20	South America / Brazil / Sao Paulo / Aracatuba	Human	Ion Torrent S5	B.1.1.28	GR
hCoV-19/Brazil/SP-442/2020	EPI_ISL_603039	2020-07-17	South America / Brazil / Sao Paulo / Campinas	Human	Ion Torrent S5	B.1.1.33	GR
hCoV-19/Brazil/SP-Pat14/2020	EPI_ISL_613563	2020-04-01	South America / Brazil / Sao Paulo / Ribeirao Preto	Human	Nanopore MinIon	B.1.1.33	GR
hCoV-19/Brazil/SP-Pat22/2020	EPI_ISL_613564	2020-04-05	South America / Brazil / Sao Paulo / Ribeirao Preto	Human	Nanopore MinIon	B.1.1.33	GR
hCoV-19/Brazil/SP-RP4/2020	EPI_ISL_613707	2020-03-24	South America / Brazil / Sao Paulo / Ribeirao Preto	Human	Nanopore MinIon	B.1.1.33	GR
hCoV-19/Brazil/SP-RP21/2020	EPI_ISL_613708	2020-04-05	South America / Brazil / Sao Paulo / Ribeirao Preto	Human	Nanopore MinIon	B.1.1.33	GR
hCoV-19/Brazil/SP-RP2/2020	EPI_ISL_613709	2020-03-22	South America / Brazil / Sao Paulo / Ribeirao Preto	Human	Nanopore MinIon	B.1.1.33	GR
hCoV-19/Brazil/SP-RP9/2020	EPI_ISL_613951	2020-04-01	South America / Brazil / Sao Paulo / Ribeirao Preto	Human	Nanopore MinION	B.1.1.33	GR
hCoV-19/Brazil/RJ-00305/2020	EPI_ISL_623108	2020-04-16	South America / Brazil / Rio de Janeiro	Human	Illumina MiSeq	B.1.1.33	GR
hCoV-19/Brazil/RJ-00307/2020	EPI_ISL_623110	2020-04-24	South America / Brazil / Rio de Janeiro	Human	Illumina MiSeq	B.1.1.33	GR
hCoV-19/Brazil/RJ-00309/2020	EPI_ISL_623112	2020-04-20	South America / Brazil / Rio de Janeiro	Human	Illumina MiSeq	B.1.1.33	GR
hCoV-19/Brazil/RJ-00311/2020	EPI_ISL_623114	2020-04-24	South America / Brazil / Rio de Janeiro	Human	Illumina MiSeq	B.1.1.33	GR
hCoV-19/Brazil/RJ-00313/2020	EPI_ISL_623116	2020-04-07	South America / Brazil / Rio de Janeiro	Human	Illumina MiSeq	B.1.1.33	GR
hCoV-19/Brazil/RJ-00315/2020	EPI_ISL_623118	2020-04-24	South America / Brazil / Rio de Janeiro	Human	Illumina MiSeq	B.1.1.33	GR
hCoV-19/Brazil/RJ-00316/2020	EPI_ISL_623119	2020-05-04	South America / Brazil / Rio de Janeiro	Human	Illumina MiSeq	B.1.1.33	GR
hCoV-19/Brazil/RJ-00317/2020	EPI_ISL_623120	2020-04-22	South America / Brazil / Rio de Janeiro	Human	Illumina MiSeq	B.1.1.33	GR
hCoV-19/Brazil/RJ-00321/2020	EPI_ISL_623124	2020-04-22	South America / Brazil / Rio de Janeiro	Human	Illumina MiSeq	B.1.1.33	GR
hCoV-19/Brazil/RJ-00323/2020	EPI_ISL_623126	2020-04-01	South America / Brazil / Rio de Janeiro	Human	Illumina MiSeq	B.1.1.33	GR
hCoV-19/Brazil/RJ-00326/2020	EPI_ISL_623129	2020-04-29	South America / Brazil / Rio de Janeiro	Human	Illumina MiSeq	B.1.1.33	GR
hCoV-19/Brazil/RJ-00327/2020	EPI_ISL_623130	2020-04-22	South America / Brazil / Rio de Janeiro	Human	Illumina MiSeq	B.1.1.28	GR
hCoV-19/Brazil/RJ-00329/2020	EPI_ISL_623132	2020-04-09	South America / Brazil / Rio de Janeiro	Human	Illumina MiSeq	B.1.1.33	GR
hCoV-19/Brazil/RJ-00331/2020	EPI_ISL_623134	2020-04-28	South America / Brazil / Rio de Janeiro	Human	Illumina MiSeq	B.1.1.33	GR
hCoV-19/Brazil/RJ-00337/2020	EPI_ISL_623140	2020-04-17	South America / Brazil / Rio de Janeiro	Human	Illumina MiSeq	B.1.1.33	GR
hCoV-19/Brazil/RJ-00339/2020	EPI_ISL_623142	2020-04-22	South America / Brazil / Rio de Janeiro	Human	Illumina MiSeq	B.1.1.33	GR
hCoV-19/Brazil/RJ-00340/2020	EPI_ISL_623143	2020-05-11	South America / Brazil / Rio de Janeiro	Human	Illumina MiSeq	B.1.1.33	GR
hCoV-19/Brazil/RJ-00341/2020	EPI_ISL_623144	2020-05-04	South America / Brazil / Rio de Janeiro	Human	Illumina MiSeq	B.1.1.33	GR
hCoV-19/Brazil/RJ-00342/2020	EPI_ISL_623145	2020-05-18	South America / Brazil / Rio de Janeiro	Human	Illumina MiSeq	B.1.1.33	GR
hCoV-19/Brazil/RJ-00343/2020	EPI_ISL_623146	2020-04-29	South America / Brazil / Rio de Janeiro	Human	Illumina MiSeq	B.1.1.33	GR
hCoV-19/Brazil/RJ-00344/2020	EPI_ISL_623147	2020-05-18	South America / Brazil / Rio de Janeiro	Human	Illumina MiSeq	B.1.1.33	GR
hCoV-19/Brazil/RJ-00345/2020	EPI_ISL_623148	2020-04-27	South America / Brazil / Rio de Janeiro	Human	Illumina MiSeq	B.1.1.33	GR
hCoV-19/Brazil/RJ-00346/2020	EPI_ISL_623149	2020-05-08	South America / Brazil / Rio de Janeiro	Human	Illumina MiSeq	B.1.1.33	GR
hCoV-19/Brazil/RJ-00349/2020	EPI_ISL_623152	2020-04-16	South America / Brazil / Rio de Janeiro	Human	Illumina MiSeq	B.1.1.33	GR
hCoV-19/Brazil/RJ-00351/2020	EPI_ISL_623154	2020-04-27	South America / Brazil / Rio de Janeiro	Human	Illumina MiSeq	B.1.1.33	GR
hCoV-19/Brazil/RJ-00354/2020	EPI_ISL_623157	2020-04-30	South America / Brazil / Rio de Janeiro	Human	Illumina MiSeq	B.1.1.33	GR
hCoV-19/Brazil/RJ-00355/2020	EPI_ISL_623158	2020-05-07	South America / Brazil / Rio de Janeiro	Human	Illumina MiSeq	B.1.1.33	GR
hCoV-19/Brazil/RJ-00357/2020	EPI_ISL_623160	2020-04-22	South America / Brazil / Rio de Janeiro	Human	Illumina MiSeq	B.1.1.33	GR
hCoV-19/Brazil/RJ-00358/2020	EPI_ISL_623161	2020-05-04	South America / Brazil / Rio de Janeiro	Human	Illumina MiSeq	B.1.1.33	GR
hCoV-19/Brazil/RJ-00359/2020	EPI_ISL_623162	2020-04-29	South America / Brazil / Rio de Janeiro	Human	Illumina MiSeq	B.1.1.33	GR
hCoV-19/Brazil/RJ-00361/2020	EPI_ISL_623164	2020-04-29	South America / Brazil / Rio de Janeiro	Human	Illumina MiSeq	B.1.1.33	GR
hCoV-19/Brazil/RJ-00362/2020	EPI_ISL_623165	2020-05-05	South America / Brazil / Rio de Janeiro	Human	Illumina MiSeq	B.1.1.33	GR
hCoV-19/Brazil/RJ-00363/2020	EPI_ISL_623166	2020-04-20	South America / Brazil / Rio de Janeiro	Human	Illumina MiSeq	B.1.1.33	GR
hCoV-19/Brazil/RJ-00365/2020	EPI_ISL_623168	2020-04-08	South America / Brazil / Rio de Janeiro	Human	Illumina MiSeq	B.1.1.33	GR
hCoV-19/Brazil/RJ-06020/2020	EPI_ISL_636737	2020-05-29	South America / Brazil / Rio de Janeiro	Human	MGI	B.1.1.33	GR
hCoV-19/Brazil/RJ-01020R2/2020	EPI_ISL_636835	2020-05-29	South America / Brazil / Rio de Janeiro	Human	MGI	B.1.1.33	GR
hCoV-19/Brazil/RJ-0720R2/2020	EPI_ISL_636837	2020-05-29	South America / Brazil / Rio de Janeiro	Human	MGI	B.1.1.33	GR
hCoV-19/Brazil/SP-L25-CD635/2020	EPI_ISL_672705	2020-04-08	South America / Brazil / São Paulo	Human	Oxford Nanopore	B.1.1.248	GR
hCoV-19/Brazil/SP-L25-CD647/2020	EPI_ISL_672711	2020-04-11	South America / Brazil / São Paulo	Human	Oxford Nanopore	B.1.1.248	GR
hCoV-19/Brazil/SP-L25-CD669/2020	EPI_ISL_672719	2020-04-14	South America / Brazil / São Paulo	Human	Oxford Nanopore	B.1.1.248	GR
hCoV-19/Brazil/SP-L25-CD670/2020	EPI_ISL_672720	2020-04-14	South America / Brazil / São Paulo	Human	Oxford Nanopore	B.1.1.248	GR
hCoV-19/Brazil/SP-L28-CD686/2020	EPI_ISL_672748	2020-04-15	South America / Brazil / São Paulo	Human	Oxford Nanopore	B.1.1.248	GR
hCoV-19/Brazil/SP-565/2020	EPI_ISL_693195	2020-03-20	South America / Brazil / Sao Paulo / Sao Paulo	Human	Ion Torrent S5	B.1.1.248	GR
hCoV-19/Brazil/SP-243/2020	EPI_ISL_693196	2020-05-02	South America / Brazil / Sao Paulo / Sao Paulo	Human	Ion Torrent S5	B.1.1.248	GR
hCoV-19/Brazil/SP-249/2020	EPI_ISL_693198	2020-05-04	South America / Brazil / Sao Paulo / Sao Paulo	Human	Ion Torrent S5	B.1.1.248	GR
hCoV-19/Brazil/SP-253/2020	EPI_ISL_693199	2020-05-20	South America / Brazil / Sao Paulo / Sao Paulo	Human	Ion Torrent S5	B.1.1.248	GR
hCoV-19/Brazil/SP-571/2020	EPI_ISL_693200	2020-04-29	South America / Brazil / Sao Paulo / Mairipora	Human	Ion Torrent S5	B.1.1.248	GR
hCoV-19/Brazil/SP-572/2020	EPI_ISL_693201	2020-04-01	South America / Brazil / Sao Paulo / Sao Paulo	Human	Ion Torrent S5	B.1.1.248	GR
hCoV-19/Brazil/SP-573/2020	EPI_ISL_693202	2020-04-01	South America / Brazil / Sao Paulo / Sao Paulo	Human	Ion Torrent S5	B.1.1.248	GR
hCoV-19/Brazil/SP-575/2020	EPI_ISL_693203	2020-04-21	South America / Brazil / Sao Paulo / Sao Paulo	Human	Ion Torrent S5	B.1.1.248	GR
hCoV-19/Brazil/SP-352/2020	EPI_ISL_693204	2020-06-22	South America / Brazil / Sao Paulo / Osasco	Human	Ion Torrent S5	B.1.1.248	GR
hCoV-19/Brazil/SP-577/2020	EPI_ISL_693205	2020-06-22	South America / Brazil / Sao Paulo / Taruma	Human	Ion Torrent S5	B.1.1.248	GR
hCoV-19/Brazil/SP-361/2020	EPI_ISL_693206	2020-06-21	South America / Brazil / Sao Paulo / Campinas	Human	Ion Torrent S5	B.1.1.248	GR
hCoV-19/Brazil/SP-366/2020	EPI_ISL_693207	2020-06-24	South America / Brazil / Sao Paulo / Sumare	Human	Ion Torrent S5	B.1.1.248	GR
hCoV-19/Brazil/SP-400/2020	EPI_ISL_693208	2020-07-01	South America / Brazil / Sao Paulo / Osasco	Human	Ion Torrent S5	B.1.1.248	GR
hCoV-19/Brazil/SP-401/2020	EPI_ISL_693209	2020-07-01	South America / Brazil / Sao Paulo / Osasco	Human	Ion Torrent S5	B.1.1.143	GR
hCoV-19/Brazil/SP-415/2020	EPI_ISL_693210	2020-07-06	South America / Brazil / Sao Paulo / Osasco	Human	Ion Torrent S5	B.1.1.248	GR
hCoV-19/Brazil/SP-416/2020	EPI_ISL_693211	2020-07-06	South America / Brazil / Sao Paulo / Cunha	Human	Ion Torrent S5	B.1.1.248	GR
hCoV-19/Brazil/SP-423/2020	EPI_ISL_693212	2020-07-06	South America / Brazil / Sao Paulo / Braganca Paulista	Human	Ion Torrent S5	B.1.1.248	GR
hCoV-19/Brazil/SP-390/2020	EPI_ISL_693213	2020-06-18	South America / Brazil / Sao Paulo / Hortolandia	Human	Ion Torrent S5	B.1.1.33	GR
hCoV-19/Brazil/SP-579/2020	EPI_ISL_693214	2020-07-19	South America / Brazil / Sao Paulo / Sao Sebastiao	Human	Ion Torrent S5	B.1.1.248	GR
hCoV-19/Brazil/SP-589/2020	EPI_ISL_693215	2020-07-06	South America / Brazil / Sao Paulo / Limeira	Human	Ion Torrent S5	B.1.1.248	GR
hCoV-19/Brazil/SP-590/2020	EPI_ISL_693216	2020-07-05	South America / Brazil / Sao Paulo / Araras	Human	Ion Torrent S5	B.1.1.248	GR
hCoV-19/Brazil/SP-591/2020	EPI_ISL_693217	2020-07-05	South America / Brazil / Sao Paulo / Araras	Human	Ion Torrent S5	B.1.1.248	GR
hCoV-19/Brazil/SP-594/2020	EPI_ISL_693218	2020-06-16	South America / Brazil / Sao Paulo / Presidente Prudente	Human	Ion Torrent S5	B.1.1.33	GR
hCoV-19/Brazil/SP-595/2020	EPI_ISL_693219	2020-06-16	South America / Brazil / Sao Paulo / Taciba	Human	Ion Torrent S5	B.1.1.33	GR
hCoV-19/Brazil/SP-596/2020	EPI_ISL_693220	2020-07-01	South America / Brazil / Sao Paulo / Piracicaba	Human	Ion Torrent S5	B.1.1.248	GR
hCoV-19/Brazil/SP-597/2020	EPI_ISL_693221	2020-06-16	South America / Brazil / Sao Paulo / Birigui	Human	Ion Torrent S5	B.1.1.143	GR
hCoV-19/Brazil/SP-598/2020	EPI_ISL_693222	2020-06-16	South America / Brazil / Sao Paulo / Birigui	Human	Ion Torrent S5	B.1.1.33	GR
hCoV-19/Brazil/SP-643/2020	EPI_ISL_693223	2020-07-02	South America / Brazil / Sao Paulo / Piracicaba	Human	Ion Torrent S5	B.1.1.248	GR
hCoV-19/Brazil/SP-645/2020	EPI_ISL_693224	2020-07-02	South America / Brazil / Sao Paulo / Piracicaba	Human	Ion Torrent S5	B.1.1.248	GR
hCoV-19/Brazil/SP-652/2020	EPI_ISL_693225	2020-07-06	South America / Brazil / Sao Paulo / Diadema	Human	Ion Torrent S5	B.1.1.248	GR
hCoV-19/Brazil/SP-653/2020	EPI_ISL_693226	2020-06-16	South America / Brazil / Sao Paulo / Campinas	Human	Ion Torrent S5	B.1.1.248	GR
hCoV-19/Brazil/SP-658/2020	EPI_ISL_693227	2020-07-06	South America / Brazil / Sao Paulo / Sao Bernardo do Campo	Human	Ion Torrent S5	B.1.1.33	GR
hCoV-19/Brazil/SP-661/2020	EPI_ISL_693228	2020-06-22	South America / Brazil / Sao Paulo / Sorocaba	Human	Ion Torrent S5	B.1.1.248	GR
hCoV-19/Brazil/SP-666/2020	EPI_ISL_693229	2020-06-16	South America / Brazil / Sao Paulo / Guarulhos	Human	Ion Torrent S5	B.1.1.248	GR
hCoV-19/Brazil/SP-667/2020	EPI_ISL_693230	2020-06-13	South America / Brazil / Sao Paulo / Cotia	Human	Ion Torrent S5	B.1.1.248	GR
hCoV-19/Brazil/SP-668/2020	EPI_ISL_693231	2020-06-27	South America / Brazil / Sao Paulo / Jacareí	Human	Ion Torrent S5	B.1.1.248	GR
hCoV-19/Brazil/SP-673/2020	EPI_ISL_693232	2020-05-30	South America / Brazil / Sao Paulo / São Paulo	Human	Ion Torrent S5	B.1.1.248	GR
hCoV-19/Brazil/SP-678/2020	EPI_ISL_693233	2020-06-12	South America / Brazil / Sao Paulo / Itapecerica da Serra	Human	Ion Torrent S5	B.1.1.248	GR
hCoV-19/Brazil/SP-688/2020	EPI_ISL_693234	2020-06-30	South America / Brazil / Sao Paulo / Rio Grande da Serra	Human	Ion Torrent S5	B.1.1.248	GR
hCoV-19/Brazil/SP-689/2020	EPI_ISL_693235	2020-06-30	South America / Brazil / Sao Paulo / Rio Grande da Serra	Human	Ion Torrent S5	B.1.1.248	GR
hCoV-19/Brazil/SP-692/2020	EPI_ISL_693236	2020-07-02	South America / Brazil / Sao Paulo / São Paulo	Human	Ion Torrent S6	B.1.1.248	GR
hCoV-19/Brazil/SP-694/2020	EPI_ISL_693237	2020-07-01	South America / Brazil / Sao Paulo / Mogi das Cruzes	Human	Ion Torrent S7	B.1.1.248	GR
hCoV-19/Brazil/SP-696/2020	EPI_ISL_693238	2020-06-30	South America / Brazil / Sao Paulo / Santos	Human	Ion Torrent S8	B.1.1.248	GR
hCoV-19/Brazil/SP-697/2020	EPI_ISL_693239	2020-06-30	South America / Brazil / Sao Paulo / Santos	Human	Ion Torrent S9	B.1.1.248	GR
hCoV-19/Brazil/SP-698/2020	EPI_ISL_693240	2020-06-30	South America / Brazil / Sao Paulo / Diadema	Human	Ion Torrent S10	B.1.1.248	GR
hCoV-19/Brazil/SP-699/2020	EPI_ISL_693241	2020-06-30	South America / Brazil / Sao Paulo / Ribeirao Pires	Human	Ion Torrent S11	B.1.1.248	GR
hCoV-19/Brazil/SP-702/2020	EPI_ISL_693242	2020-06-30	South America / Brazil / Sao Paulo / Diadema	Human	Ion Torrent S12	B.1.1.248	GR
hCoV-19/Brazil/SP-710/2020	EPI_ISL_693243	2020-06-27	South America / Brazil / Sao Paulo / Piracicaba	Human	Ion Torrent S13	B.1.1.248	GR
hCoV-19/Brazil/SP-716/2020	EPI_ISL_693244	2020-07-02	South America / Brazil / Sao Paulo / Sorocaba	Human	Ion Torrent S14	B.1.1.248	GR
hCoV-19/Brazil/SP-719/2020	EPI_ISL_693245	2020-07-02	South America / Brazil / Sao Paulo / Mogi das Cruzes	Human	Ion Torrent S15	B.1.1.248	GR
hCoV-19/Brazil/SP-721/2020	EPI_ISL_693246	2020-06-30	South America / Brazil / Sao Paulo / Rio Grande da Serra	Human	Ion Torrent S16	B.1.1.33	GR
hCoV-19/Brazil/SP-705/2020	EPI_ISL_693247	2020-06-30	South America / Brazil / Sao Paulo / Santos	Human	Ion Torrent S17	B.1.1.33	GR
hCoV-19/Brazil/SP-735/2020	EPI_ISL_693248	2020-07-06	South America / Brazil / Sao Paulo / Limeira	Human	Ion Torrent S18	B.1.1.33	GR
hCoV-19/Brazil/SP-844R1/2020	EPI_ISL_708529	2020-06-29	South America / Brazil / Sao Paulo / Fernandopolis	Human	Ion Torrent S5	B.1.1.33	GR
hCoV-19/Brazil/SP-844R2/2020	EPI_ISL_708530	2020-11-21	South America / Brazil / Sao Paulo / Fernandopolis	Human	Ion Torrent S5	B.1.1.248	GR
hCoV-19/Brazil/RJ-00402/2020	EPI_ISL_717806	2020-09-03	South America / Brazil / Rio de Janeiro / Rio de Janeiro	Human	Illumina MiSeq	B.1.1.257	GR
hCoV-19/Brazil/RJ-00404/2020	EPI_ISL_717807	2020-11-05	South America / Brazil / Rio de Janeiro / São João de Meriti	Human	Illumina MiSeq	B.1.1.248	GR
hCoV-19/Brazil/RJ-00405/2020	EPI_ISL_717808	2020-11-03	South America / Brazil / Rio de Janeiro / Rio de Janeiro	Human	Illumina MiSeq	B.1.1.248	GR
hCoV-19/Brazil/RJ-00407/2020	EPI_ISL_717809	2020-09-28	South America / Brazil / Rio de Janeiro / Maricá	Human	Illumina MiSeq	B.1.1	GR
hCoV-19/Brazil/RJ-00408/2020	EPI_ISL_717810	2020-04-14	South America / Brazil / Rio de Janeiro / Rio de Janeiro	Human	Illumina MiSeq	B.1.1.248	GR
hCoV-19/Brazil/RJ-00409/2020	EPI_ISL_717811	2020-04-16	South America / Brazil / Rio de Janeiro / Rio de Janeiro	Human	Illumina MiSeq	B.1.1.248	GR
hCoV-19/Brazil/RJ-00410/2020	EPI_ISL_717812	2020-06-01	South America / Brazil / Rio de Janeiro / Rio de Janeiro	Human	Illumina MiSeq	B.1.1.248	GR
hCoV-19/Brazil/RJ-00411/2020	EPI_ISL_717813	2020-06-01	South America / Brazil / Rio de Janeiro / Rio de Janeiro	Human	Illumina MiSeq	B.1.1.248	GR
hCoV-19/Brazil/RJ-00412/2020	EPI_ISL_717814	2020-09-03	South America / Brazil / Rio de Janeiro / Nilópolis	Human	Illumina MiSeq	B.1.1.248	GR
hCoV-19/Brazil/RJ-00413/2020	EPI_ISL_717815	2020-09-03	South America / Brazil / Rio de Janeiro / Rio de Janeiro	Human	Illumina MiSeq	B.1.1.248	GR
hCoV-19/Brazil/RJ-00414/2020	EPI_ISL_717816	2020-09-03	South America / Brazil / Rio de Janeiro / Rio de Janeiro	Human	Illumina MiSeq	B.1.1.277	GR
hCoV-19/Brazil/RJ-00415/2020	EPI_ISL_717817	2020-09-04	South America / Brazil / Rio de Janeiro / Rio de Janeiro	Human	Illumina MiSeq	B.1.1.277	GR
hCoV-19/Brazil/RJ-00416/2020	EPI_ISL_717818	2020-10-08	South America / Brazil / Rio de Janeiro / Rio de Janeiro	Human	Illumina MiSeq	B.1.1.248	GR
hCoV-19/Brazil/RJ-00417/2020	EPI_ISL_717819	2020-10-09	South America / Brazil / Rio de Janeiro / Rio de Janeiro	Human	Illumina MiSeq	B.1.1.248	GR
hCoV-19/Brazil/RJ-00418/2020	EPI_ISL_717820	2020-10-26	South America / Brazil / Rio de Janeiro / Duque de Caxias	Human	Illumina MiSeq	B.1.1.248	GR
hCoV-19/Brazil/RJ-00419/2020	EPI_ISL_717821	2020-10-26	South America / Brazil / Rio de Janeiro / Rio de Janeiro	Human	Illumina MiSeq	B.1.1.248	GR
hCoV-19/Brazil/RJ-00420/2020	EPI_ISL_717822	2020-10-26	South America / Brazil / Rio de Janeiro / Duque de Caxias	Human	Illumina MiSeq	B.1.1.248	GR
hCoV-19/Brazil/RJ-00421/2020	EPI_ISL_717823	2020-10-29	South America / Brazil / Rio de Janeiro / Rio de Janeiro	Human	Illumina MiSeq	B.1.1.248	GR
hCoV-19/Brazil/RJ-00422/2020	EPI_ISL_717824	2020-10-29	South America / Brazil / Rio de Janeiro / Rio de Janeiro	Human	Illumina MiSeq	B.1.1.143	GR
hCoV-19/Brazil/RJ-00423/2020	EPI_ISL_717825	2020-11-03	South America / Brazil / Rio de Janeiro / Nova Iguaçu	Human	Illumina MiSeq	B.1.1.248	GR
hCoV-19/Brazil/RJ-00424/2020	EPI_ISL_717826	2020-11-03	South America / Brazil / Rio de Janeiro / Rio de Janeiro	Human	Illumina MiSeq	B.1.1.248	GR
hCoV-19/Brazil/RJ-00425/2020	EPI_ISL_717827	2020-11-03	South America / Brazil / Rio de Janeiro / Rio de Janeiro	Human	Illumina MiSeq	B.1.1.248	GR
hCoV-19/Brazil/RJ-00426/2020	EPI_ISL_717828	2020-11-04	South America / Brazil / Rio de Janeiro / Rio de Janeiro	Human	Illumina MiSeq	B.1.1.248	GR
hCoV-19/Brazil/RJ-00427/2020	EPI_ISL_717829	2020-11-04	South America / Brazil / Rio de Janeiro / Rio de Janeiro	Human	Illumina MiSeq	B.1.1.248	GR
hCoV-19/Brazil/RJ-00428/2020	EPI_ISL_717830	2020-11-05	South America / Brazil / Rio de Janeiro / Rio de Janeiro	Human	Illumina MiSeq	B.1.1.248	GR
hCoV-19/Brazil/RJ-00432/2020	EPI_ISL_717831	2020-10-30	South America / Brazil / Rio de Janeiro / São Gonçalo	Human	Illumina MiSeq	B.1.1	GR
hCoV-19/Brazil/RJ-00437/2020	EPI_ISL_717832	2020-06-01	South America / Brazil / Rio de Janeiro / Maricá	Human	Illumina MiSeq	B.1.1.277	GR
hCoV-19/Brazil/RJ-00438/2020	EPI_ISL_717833	2020-06-03	South America / Brazil / Rio de Janeiro / Maricá	Human	Illumina MiSeq	B.1.1.33	GR
hCoV-19/Brazil/RJ-00439/2020	EPI_ISL_717834	2020-06-02	South America / Brazil / Rio de Janeiro / Maricá	Human	Illumina MiSeq	B.1.1.33	GR
hCoV-19/Brazil/RJ-00440/2020	EPI_ISL_717835	2020-06-03	South America / Brazil / Rio de Janeiro / Maricá	Human	Illumina MiSeq	B.1.1.33	GR
hCoV-19/Brazil/RJ-00441/2020	EPI_ISL_717836	2020-06-03	South America / Brazil / Rio de Janeiro / Maricá	Human	Illumina MiSeq	B.1.1.33	GR
hCoV-19/Brazil/RJ-00442/2020	EPI_ISL_717837	2020-04-07	South America / Brazil / Rio de Janeiro / Rio de Janeiro	Human	Illumina MiSeq	B.1.1.33	GR
hCoV-19/Brazil/RJ-00443/2020	EPI_ISL_717838	2020-04-08	South America / Brazil / Rio de Janeiro / Rio de Janeiro	Human	Illumina MiSeq	B.1.1.33	GR
hCoV-19/Brazil/RJ-00444/2020	EPI_ISL_717839	2020-04-08	South America / Brazil / Rio de Janeiro / Rio de Janeiro	Human	Illumina MiSeq	B.1.1.33	GR
hCoV-19/Brazil/RJ-00445/2020	EPI_ISL_717840	2020-04-13	South America / Brazil / Rio de Janeiro / Rio de Janeiro	Human	Illumina MiSeq	B.1.1.33	GR
hCoV-19/Brazil/RJ-00446/2020	EPI_ISL_717841	2020-07-28	South America / Brazil / Rio de Janeiro / Maricá	Human	Illumina MiSeq	B.1.1.314	GR
hCoV-19/Brazil/RJ-00448/2020	EPI_ISL_717843	2020-04-20	South America / Brazil / Rio de Janeiro / Rio de Janeiro	Human	Illumina MiSeq	B.1.1.33	GR
hCoV-19/Brazil/RJ-00449/2020	EPI_ISL_717844	2020-04-24	South America / Brazil / Rio de Janeiro / Rio de Janeiro	Human	Illumina MiSeq	B.1.1.33	GR
hCoV-19/Brazil/RJ-00450/2020	EPI_ISL_717845	2020-06-01	South America / Brazil / Rio de Janeiro / Nova Iguaçu	Human	Illumina MiSeq	B.1.1.33	GR
hCoV-19/Brazil/RJ-00451/2020	EPI_ISL_717846	2020-06-01	South America / Brazil / Rio de Janeiro / Rio de Janeiro	Human	Illumina MiSeq	B.1.1.33	GR
hCoV-19/Brazil/RJ-00452/2020	EPI_ISL_717847	2020-06-01	South America / Brazil / Rio de Janeiro / Belford Roxo	Human	Illumina MiSeq	B.1.1.33	GR
hCoV-19/Brazil/RJ-00453/2020	EPI_ISL_717848	2020-06-01	South America / Brazil / Rio de Janeiro / Seropédica	Human	Illumina MiSeq	B.1.1.33	GR
hCoV-19/Brazil/RJ-00454/2020	EPI_ISL_717849	2020-06-01	South America / Brazil / Rio de Janeiro / Nilópolis	Human	Illumina MiSeq	B.1.1.33	GR
hCoV-19/Brazil/RJ-00455/2020	EPI_ISL_717850	2020-06-01	South America / Brazil / Rio de Janeiro / Itaguaí	Human	Illumina MiSeq	B.1.1.33	GR
hCoV-19/Brazil/RJ-00456/2020	EPI_ISL_717851	2020-06-01	South America / Brazil / Rio de Janeiro / Rio de Janeiro	Human	Illumina MiSeq	B.1.1.33	GR
hCoV-19/Brazil/RJ-00457/2020	EPI_ISL_717852	2020-06-01	South America / Brazil / Rio de Janeiro / Rio de Janeiro	Human	Illumina MiSeq	B.1.1.33	GR
hCoV-19/Brazil/RJ-00458/2020	EPI_ISL_717853	2020-07-01	South America / Brazil / Rio de Janeiro / Rio de Janeiro	Human	Illumina MiSeq	B.1.1.33	GR
hCoV-19/Brazil/RJ-00459/2020	EPI_ISL_717854	2020-07-01	South America / Brazil / Rio de Janeiro / Rio de Janeiro	Human	Illumina MiSeq	B.1.1.33	GR
hCoV-19/Brazil/RJ-00460/2020	EPI_ISL_717855	2020-07-01	South America / Brazil / Rio de Janeiro / Rio de Janeiro	Human	Illumina MiSeq	B.1.1.33	GR
hCoV-19/Brazil/RJ-00461/2020	EPI_ISL_717856	2020-07-02	South America / Brazil / Rio de Janeiro / Rio de Janeiro	Human	Illumina MiSeq	B.1.1.33	GR
hCoV-19/Brazil/RJ-00462/2020	EPI_ISL_717857	2020-07-02	South America / Brazil / Rio de Janeiro / Rio de Janeiro	Human	Illumina MiSeq	B.1.1.33	GR
hCoV-19/Brazil/RJ-00463/2020	EPI_ISL_717858	2020-07-02	South America / Brazil / Rio de Janeiro / Rio de Janeiro	Human	Illumina MiSeq	B.1.1.314	GR
hCoV-19/Brazil/RJ-00464/2020	EPI_ISL_717859	2020-07-03	South America / Brazil / Rio de Janeiro / Rio de Janeiro	Human	Illumina MiSeq	B.1.1.33	GR
hCoV-19/Brazil/RJ-00465/2020	EPI_ISL_717860	2020-07-06	South America / Brazil / Rio de Janeiro / Rio de Janeiro	Human	Illumina MiSeq	B.1.1.33	GR
hCoV-19/Brazil/RJ-00466/2020	EPI_ISL_717861	2020-07-08	South America / Brazil / Rio de Janeiro / Rio de Janeiro	Human	Illumina MiSeq	B.1.1.33	GR
hCoV-19/Brazil/RJ-00467/2020	EPI_ISL_717862	2020-07-08	South America / Brazil / Rio de Janeiro / Rio de Janeiro	Human	Illumina MiSeq	B.1.1.33	GR
hCoV-19/Brazil/RJ-00468/2020	EPI_ISL_717863	2020-08-03	South America / Brazil / Rio de Janeiro / São João de Meriti	Human	Illumina MiSeq	B.1.1.33	GR
hCoV-19/Brazil/RJ-00469/2020	EPI_ISL_717864	2020-08-03	South America / Brazil / Rio de Janeiro / Rio de Janeiro	Human	Illumina MiSeq	B.1.1.33	GR
hCoV-19/Brazil/RJ-00470/2020	EPI_ISL_717865	2020-08-03	South America / Brazil / Rio de Janeiro / Guapimirim	Human	Illumina MiSeq	B.1.1.33	GR
hCoV-19/Brazil/RJ-00471/2020	EPI_ISL_717866	2020-08-03	South America / Brazil / Rio de Janeiro / Guapimirim	Human	Illumina MiSeq	B.1.1.33	GR
hCoV-19/Brazil/RJ-00472/2020	EPI_ISL_717867	2020-08-04	South America / Brazil / Rio de Janeiro / Rio de Janeiro	Human	Illumina MiSeq	B.1.1.33	GR
hCoV-19/Brazil/RJ-00473/2020	EPI_ISL_717868	2020-08-05	South America / Brazil / Rio de Janeiro / São João de Meriti	Human	Illumina MiSeq	B.1.1.33	GR
hCoV-19/Brazil/RJ-00476/2020	EPI_ISL_717871	2020-09-04	South America / Brazil / Rio de Janeiro / Rio de Janeiro	Human	Illumina MiSeq	B.1.1.33	GR
hCoV-19/Brazil/RJ-00477/2020	EPI_ISL_717872	2020-09-04	South America / Brazil / Rio de Janeiro / Rio de Janeiro	Human	Illumina MiSeq	B.1.1.33	GR
hCoV-19/Brazil/RJ-00478/2020	EPI_ISL_717873	2020-09-08	South America / Brazil / Rio de Janeiro / Rio de Janeiro	Human	Illumina MiSeq	B.1.1.33	GR
hCoV-19/Brazil/RJ-00479/2020	EPI_ISL_717874	2020-10-09	South America / Brazil / Rio de Janeiro / São João de Meriti	Human	Illumina MiSeq	B.1.1.33	GR
hCoV-19/Brazil/RJ-00480/2020	EPI_ISL_717875	2020-10-09	South America / Brazil / Rio de Janeiro / Duque de Caxias	Human	Illumina MiSeq	B.1.1.33	GR
hCoV-19/Brazil/RJ-00482/2020	EPI_ISL_717876	2020-10-09	South America / Brazil / Rio de Janeiro / Rio de Janeiro	Human	Illumina MiSeq	B.1.1.33	GR
hCoV-19/Brazil/RJ-00483/2020	EPI_ISL_717877	2020-10-26	South America / Brazil / Rio de Janeiro / Rio de Janeiro	Human	Illumina MiSeq	B.1.1.33	GR
hCoV-19/Brazil/RJ-00484/2020	EPI_ISL_717878	2020-10-26	South America / Brazil / Rio de Janeiro / Rio de Janeiro	Human	Illumina MiSeq	B.1.1.33	GR
hCoV-19/Brazil/RJ-00486/2020	EPI_ISL_717880	2020-10-26	South America / Brazil / Rio de Janeiro / Niterói	Human	Illumina MiSeq	B.1.1.33	GR
hCoV-19/Brazil/RJ-00487/2020	EPI_ISL_717881	2020-10-26	South America / Brazil / Rio de Janeiro / São João de Meriti	Human	Illumina MiSeq	B.1.1.33	GR
hCoV-19/Brazil/RJ-00488/2020	EPI_ISL_717882	2020-10-26	South America / Brazil / Rio de Janeiro / Rio de Janeiro	Human	Illumina MiSeq	B.1.1.33	GR
hCoV-19/Brazil/RJ-00490/2020	EPI_ISL_717884	2020-10-27	South America / Brazil / Rio de Janeiro / São João de Meriti	Human	Illumina MiSeq	B.1.1.33	GR
hCoV-19/Brazil/RJ-00493/2020	EPI_ISL_717887	2020-10-29	South America / Brazil / Rio de Janeiro / Rio de Janeiro	Human	Illumina MiSeq	B.1.1.33	GR
hCoV-19/Brazil/RJ-00494/2020	EPI_ISL_717888	2020-10-29	South America / Brazil / Rio de Janeiro / Rio de Janeiro	Human	Illumina MiSeq	B.1.1.33	GR
hCoV-19/Brazil/RJ-00495/2020	EPI_ISL_717889	2020-10-30	South America / Brazil / Rio de Janeiro / Rio de Janeiro	Human	Illumina MiSeq	B.1.1.33	GR
hCoV-19/Brazil/RJ-00496/2020	EPI_ISL_717890	2020-11-03	South America / Brazil / Rio de Janeiro / Rio de Janeiro	Human	Illumina MiSeq	B.1.1.33	GR
hCoV-19/Brazil/RJ-00497/2020	EPI_ISL_717891	2020-11-03	South America / Brazil / Rio de Janeiro / Rio de Janeiro	Human	Illumina MiSeq	B.1.1.33	GR
hCoV-19/Brazil/RJ-00498/2020	EPI_ISL_717892	2020-11-03	South America / Brazil / Rio de Janeiro / Rio de Janeiro	Human	Illumina MiSeq	B.1.1.33	GR
hCoV-19/Brazil/RJ-00499/2020	EPI_ISL_717893	2020-11-04	South America / Brazil / Rio de Janeiro / Rio de Janeiro	Human	Illumina MiSeq	B.1.1.33	GR
hCoV-19/Brazil/RJ-00500/2020	EPI_ISL_717894	2020-11-04	South America / Brazil / Rio de Janeiro / Itaboraí	Human	Illumina MiSeq	B.1.1.33	GR
hCoV-19/Brazil/RJ-00502/2020	EPI_ISL_717896	2020-11-04	South America / Brazil / Rio de Janeiro / Rio de Janeiro	Human	Illumina MiSeq	B.1.1.33	GR
hCoV-19/Brazil/RJ-00503/2020	EPI_ISL_717897	2020-11-04	South America / Brazil / Rio de Janeiro / Rio de Janeiro	Human	Illumina MiSeq	B.1.1.33	GR
hCoV-19/Brazil/RJ-00504/2020	EPI_ISL_717898	2020-11-05	South America / Brazil / Rio de Janeiro / Rio de Janeiro	Human	Illumina MiSeq	B.1.1.33	GR
hCoV-19/Brazil/RJ-00505/2020	EPI_ISL_717899	2020-07-27	South America / Brazil / Rio de Janeiro / Rio de Janeiro	Human	Illumina MiSeq	B.1.1.33	GR
hCoV-19/Brazil/RJ-00507/2020	EPI_ISL_717900	2020-07-27	South America / Brazil / Rio de Janeiro / Rio de Janeiro	Human	Illumina MiSeq	B.1.1.33	GR
hCoV-19/Brazil/RJ-00508/2020	EPI_ISL_717901	2020-07-30	South America / Brazil / Rio de Janeiro / Rio de Janeiro	Human	Illumina MiSeq	B.1.1.33	GR
hCoV-19/Brazil/RJ-00511/2020	EPI_ISL_717902	2020-07-27	South America / Brazil / Rio de Janeiro / São Gonçalo	Human	Illumina MiSeq	B.1.1.33	GR
hCoV-19/Brazil/RJ-00512/2020	EPI_ISL_717903	2020-07-28	South America / Brazil / Rio de Janeiro / Macaé	Human	Illumina MiSeq	B.1.1.33	GR
hCoV-19/Brazil/RJ-00515/2020	EPI_ISL_717904	2020-07-28	South America / Brazil / Rio de Janeiro / Nova Friburgo	Human	Illumina MiSeq	B.1.1.33	GR
hCoV-19/Brazil/RJ-00516/2020	EPI_ISL_717905	2020-07-28	South America / Brazil / Rio de Janeiro / Petrópolis	Human	Illumina MiSeq	B.1.1.33	GR
hCoV-19/Brazil/RJ-00517/2020	EPI_ISL_717906	2020-07-29	South America / Brazil / Rio de Janeiro / Petrópolis	Human	Illumina MiSeq	B.1.1.33	GR
hCoV-19/Brazil/RJ-00518/2020	EPI_ISL_717907	2020-07-18	South America / Brazil / Rio de Janeiro / Três Rios	Human	Illumina MiSeq	B.1.1.33	GR
hCoV-19/Brazil/RJ-00520/2020	EPI_ISL_717908	2020-08-01	South America / Brazil / Rio de Janeiro / Três Rios	Human	Illumina MiSeq	B.1.1.33	GR
hCoV-19/Brazil/RJ-00522/2020	EPI_ISL_717909	2020-07-29	South America / Brazil / Rio de Janeiro / Nova Iguaçu	Human	Illumina MiSeq	B.1.1.33	GR
hCoV-19/Brazil/RJ-00524/2020	EPI_ISL_717910	2020-05-31	South America / Brazil / Rio de Janeiro / Maricá	Human	Illumina MiSeq	B.1.1.33	GR
hCoV-19/Brazil/RJ-00525/2020	EPI_ISL_717911	2020-06-01	South America / Brazil / Rio de Janeiro / Maricá	Human	Illumina MiSeq	B.1.1.277	GR
hCoV-19/Brazil/RJ-00526/2020	EPI_ISL_717912	2020-06-02	South America / Brazil / Rio de Janeiro / Maricá	Human	Illumina MiSeq	B.1.1.33	GR
hCoV-19/Brazil/RJ-00527/2020	EPI_ISL_717913	2020-07-29	South America / Brazil / Rio de Janeiro / Maricá	Human	Illumina MiSeq	B.1.1.33	GR
hCoV-19/Brazil/RJ-00528/2020	EPI_ISL_717914	2020-07-29	South America / Brazil / Rio de Janeiro / Maricá	Human	Illumina MiSeq	B.1.1.33	GR
hCoV-19/Brazil/RJ-00529/2020	EPI_ISL_717915	2020-07-29	South America / Brazil / Rio de Janeiro / Maricá	Human	Illumina MiSeq	B.1.1.33	GR
hCoV-19/Brazil/RJ-00530/2020	EPI_ISL_717916	2020-07-29	South America / Brazil / Rio de Janeiro / Maricá	Human	Illumina MiSeq	B.1.1.33	GR
hCoV-19/Brazil/RJ-00531/2020	EPI_ISL_717917	2020-07-29	South America / Brazil / Rio de Janeiro / Maricá	Human	Illumina MiSeq	B.1.1.33	GR
hCoV-19/Brazil/RJ-00532/2020	EPI_ISL_717918	2020-06-02	South America / Brazil / Rio de Janeiro / Maricá	Human	Illumina MiSeq	B.1.1.33	GR
hCoV-19/Brazil/RJ-00533/2020	EPI_ISL_717919	2020-06-02	South America / Brazil / Rio de Janeiro / Maricá	Human	Illumina MiSeq	B.1.1.33	GR
hCoV-19/Brazil/RJ-00535/2020	EPI_ISL_717920	2020-10-29	South America / Brazil / Rio de Janeiro / Rio de Janeiro	Human	Illumina MiSeq	B.1.1.33	GR
hCoV-19/Brazil/RJ-00536/2020	EPI_ISL_717921	2020-10-26	South America / Brazil / Rio de Janeiro / Cabo Frio	Human	Illumina MiSeq	B.1.1.248	GR
hCoV-19/Brazil/RJ-00537/2020	EPI_ISL_717922	2020-10-29	South America / Brazil / Rio de Janeiro / Rio de Janeiro	Human	Illumina MiSeq	B.1.1.248	GR
hCoV-19/Brazil/RJ-00539/2020	EPI_ISL_717923	2020-11-05	South America / Brazil / Rio de Janeiro / Rio de Janeiro	Human	Illumina MiSeq	B.1.1.277	GR
hCoV-19/Brazil/RJ-00540/2020	EPI_ISL_717924	2020-10-29	South America / Brazil / Rio de Janeiro / Rio de Janeiro	Human	Illumina MiSeq	B.1.1.248	GR
hCoV-19/Brazil/RJ-00541/2020	EPI_ISL_717925	2020-10-09	South America / Brazil / Rio de Janeiro / Rio de Janeiro	Human	Illumina MiSeq	B.1.1.248	GR
hCoV-19/Brazil/RJ-00542/2020	EPI_ISL_717926	2020-10-26	South America / Brazil / Rio de Janeiro / Duque de Caxias	Human	Illumina MiSeq	B.1.1.248	GR
hCoV-19/Brazil/RJ-00543/2020	EPI_ISL_717927	2020-10-27	South America / Brazil / Rio de Janeiro / Rio de Janeiro	Human	Illumina MiSeq	B.1.1.248	GR
hCoV-19/Brazil/RJ-00544/2020	EPI_ISL_717928	2020-10-27	South America / Brazil / Rio de Janeiro / Rio de Janeiro	Human	Illumina MiSeq	B.1.1.248	GR
hCoV-19/Brazil/RJ-00545/2020	EPI_ISL_717929	2020-10-27	South America / Brazil / Rio de Janeiro / Duque de Caxias	Human	Illumina MiSeq	B.1.1.248	GR
hCoV-19/Brazil/RJ-00546/2020	EPI_ISL_717930	2020-10-27	South America / Brazil / Rio de Janeiro / Rio de Janeiro	Human	Illumina MiSeq	B.1.1	GR
hCoV-19/Brazil/RJ-00547/2020	EPI_ISL_717931	2020-10-27	South America / Brazil / Rio de Janeiro / Rio de Janeiro	Human	Illumina MiSeq	B.1.1.248	GR
hCoV-19/Brazil/RJ-00548/2020	EPI_ISL_717932	2020-10-29	South America / Brazil / Rio de Janeiro / Rio de Janeiro	Human	Illumina MiSeq	B.1.1.248	GR
hCoV-19/Brazil/RJ-00549/2020	EPI_ISL_717933	2020-10-29	South America / Brazil / Rio de Janeiro / Rio de Janeiro	Human	Illumina MiSeq	B.1.1.248	GR
hCoV-19/Brazil/RJ-00550/2020	EPI_ISL_717934	2020-10-29	South America / Brazil / Rio de Janeiro / Rio de Janeiro	Human	Illumina MiSeq	B.1.1.248	GR
hCoV-19/Brazil/RJ-00551/2020	EPI_ISL_717935	2020-10-29	South America / Brazil / Rio de Janeiro / Rio de Janeiro	Human	Illumina MiSeq	B.1.1.248	GR
hCoV-19/Brazil/RJ-00552/2020	EPI_ISL_717936	2020-10-29	South America / Brazil / Rio de Janeiro / Rio de Janeiro	Human	Illumina MiSeq	B.1.1.248	GR
hCoV-19/Brazil/RJ-00553/2020	EPI_ISL_717937	2020-10-29	South America / Brazil / Rio de Janeiro / Duque de Caxias	Human	Illumina MiSeq	B.1.1.248	GR
hCoV-19/Brazil/RJ-00554/2020	EPI_ISL_717938	2020-10-29	South America / Brazil / Rio de Janeiro / Niterói	Human	Illumina MiSeq	B.1.1.248	GR
hCoV-19/Brazil/RJ-00555/2020	EPI_ISL_717939	2020-10-29	South America / Brazil / Rio de Janeiro / Rio de Janeiro	Human	Illumina MiSeq	B.1.1.248	GR
hCoV-19/Brazil/RJ-00556/2020	EPI_ISL_717940	2020-10-30	South America / Brazil / Rio de Janeiro / Niterói	Human	Illumina MiSeq	B.1.1.248	GR
hCoV-19/Brazil/RJ-00557/2020	EPI_ISL_717941	2020-10-30	South America / Brazil / Rio de Janeiro / Rio de Janeiro	Human	Illumina MiSeq	B.1.1.248	GR
hCoV-19/Brazil/RJ-00558/2020	EPI_ISL_717942	2020-11-03	South America / Brazil / Rio de Janeiro / Rio de Janeiro	Human	Illumina MiSeq	B.1.1.248	GR
hCoV-19/Brazil/RJ-00559/2020	EPI_ISL_717943	2020-11-03	South America / Brazil / Rio de Janeiro / Rio de Janeiro	Human	Illumina MiSeq	B.1.1.277	GR
hCoV-19/Brazil/RJ-00560/2020	EPI_ISL_717944	2020-11-03	South America / Brazil / Rio de Janeiro / Rio de Janeiro	Human	Illumina MiSeq	B.1.1.248	GR
hCoV-19/Brazil/RJ-00561/2020	EPI_ISL_717945	2020-11-03	South America / Brazil / Rio de Janeiro / Rio de Janeiro	Human	Illumina MiSeq	B.1.1.248	GR
hCoV-19/Brazil/RJ-00562/2020	EPI_ISL_717946	2020-11-03	South America / Brazil / Rio de Janeiro / Rio de Janeiro	Human	Illumina MiSeq	B.1.1.248	GR
hCoV-19/Brazil/RJ-00563/2020	EPI_ISL_717947	2020-11-03	South America / Brazil / Rio de Janeiro / Rio de Janeiro	Human	Illumina MiSeq	B.1.1.248	GR
hCoV-19/Brazil/RJ-00564/2020	EPI_ISL_717948	2020-11-03	South America / Brazil / Rio de Janeiro / Rio de Janeiro	Human	Illumina MiSeq	B.1.1.248	GR
hCoV-19/Brazil/RJ-00565/2020	EPI_ISL_717949	2020-11-03	South America / Brazil / Rio de Janeiro / Rio de Janeiro	Human	Illumina MiSeq	B.1.1.248	GR
hCoV-19/Brazil/RJ-00566/2020	EPI_ISL_717950	2020-11-03	South America / Brazil / Rio de Janeiro / Rio de Janeiro	Human	Illumina MiSeq	B.1.1.248	GR
hCoV-19/Brazil/RJ-00567/2020	EPI_ISL_717951	2020-11-04	South America / Brazil / Rio de Janeiro / Rio de Janeiro	Human	Illumina MiSeq	B.1.1.248	GR
hCoV-19/Brazil/RJ-00568/2020	EPI_ISL_717952	2020-11-04	South America / Brazil / Rio de Janeiro / Rio de Janeiro	Human	Illumina MiSeq	B.1.1.248	GR
hCoV-19/Brazil/RJ-00569/2020	EPI_ISL_717953	2020-11-04	South America / Brazil / Rio de Janeiro / Rio de Janeiro	Human	Illumina MiSeq	B.1.1.248	GR
hCoV-19/Brazil/RJ-00570/2020	EPI_ISL_717954	2020-11-04	South America / Brazil / Rio de Janeiro / Rio de Janeiro	Human	Illumina MiSeq	B.1.1.248	GR
hCoV-19/Brazil/RJ-00571/2020	EPI_ISL_717955	2020-11-05	South America / Brazil / Rio de Janeiro / Rio de Janeiro	Human	Illumina MiSeq	B.1.1.248	GR
hCoV-19/Brazil/RJ-00572/2020	EPI_ISL_717956	2020-11-05	South America / Brazil / Rio de Janeiro / Rio de Janeiro	Human	Illumina MiSeq	B.1.1.248	GR
hCoV-19/Brazil/RJ-00573/2020	EPI_ISL_717957	2020-11-05	South America / Brazil / Rio de Janeiro / Rio de Janeiro	Human	Illumina MiSeq	B.1.1.248	GR
hCoV-19/Brazil/RJ-00574/2020	EPI_ISL_717958	2020-07-28	South America / Brazil / Rio de Janeiro / Maricá	Human	Illumina MiSeq	B.1.1.33	GR
hCoV-19/Brazil/RJ-00575/2020	EPI_ISL_717959	2020-08-03	South America / Brazil / Rio de Janeiro / Rio de Janeiro	Human	Illumina MiSeq	B.1.1.33	GR
hCoV-19/Brazil/RJ-00576/2020	EPI_ISL_717960	2020-10-09	South America / Brazil / Rio de Janeiro / Rio de Janeiro	Human	Illumina MiSeq	B.1.1.33	GR
hCoV-19/Brazil/RJ-00577/2020	EPI_ISL_717961	2020-11-05	South America / Brazil / Rio de Janeiro / Rio de Janeiro	Human	Illumina MiSeq	B.1.1.33	GR
hCoV-19/Brazil/RJ-00578/2020	EPI_ISL_717962	2020-07-28	South America / Brazil / Rio de Janeiro / Macaé	Human	Illumina MiSeq	B.1.1.33	GR
hCoV-19/Brazil/RJ-00579/2020	EPI_ISL_717963	2020-07-29	South America / Brazil / Rio de Janeiro / Maricá	Human	Illumina MiSeq	B.1.1.33	GR
hCoV-19/Brazil/RJ-00580/2020	EPI_ISL_717964	2020-07-29	South America / Brazil / Rio de Janeiro / Maricá	Human	Illumina MiSeq	B.1.1.33	GR
hCoV-19/Brazil/SP-L34-CD881/2020	EPI_ISL_722129	2020-04-23	South America / Brazil / São Paulo	Human	Oxford Nanopore	B.1.1.33	GR
